# Supplementary material
Source: publisher figshare collection journal article supplement (https://acs.figshare.com/ndownloader/files/3601005)

**Supporting Information for “NDI and DAN DNA: Nucleic Acid Directed Assembly of NDI  
and DAN”**

*Brian A. Ikkanda, Stevan A. Samuel, and Brent L. Iverson\**

Department of Chemistry, The University of Texas at Austin, Austin, Texas, 78712

E-mail: iversonb@austin.utexas.edu

**CONTENTS**

|                                                                                                                                  |         |
|----------------------------------------------------------------------------------------------------------------------------------|---------|
| General Procedures and Reagents.....                                                                                             | S2      |
| <b>Figure S1.</b> Chiral HPLC Chromatograms of <b>7</b> and <b>10</b> .....                                                      | S3-S4   |
| <b>Figure S2-S14.</b> <sup>1</sup> H NMR Spectra of Compounds <b>1-3</b> , <b>5-8</b> , <b>10-12</b> , and <b>14</b> .....       | S5-S15  |
| <b>Figure S15-S26.</b> <sup>13</sup> C NMR Spectra of Compounds <b>1-3</b> , <b>5-8</b> , <b>10-12</b> , and <b>14</b> .....     | S16-S26 |
| <b>Figure S27-S29.</b> <sup>31</sup> P Spectra of Compounds <b>1-3</b> .....                                                     | S27-S29 |
| <b>Table S1.</b> HRMS-ESI of individual oligonucleotides.....                                                                    | S30     |
| <b>Figure S30.</b> HPLC Chromatograms of oligonucleotides made using <b>1</b> , <b>2</b> , and/or <b>3</b> .....                 | S31-S32 |
| Method for Determining Extinction Coefficient of <b>1</b> and <b>2</b> .....                                                     | S33     |
| <b>Figure S31.</b> Structures of DAN and NDI analogues used to determine extinction coefficients for <b>1</b> and <b>2</b> ..... | S33     |
| <b>Figure S32.</b> UV melting curves of DNA duplexes .....                                                                       | S34     |

## **General Procedures and Reagents**

High-resolution mass spectra were analyzed by Q-TOF. Reactions were performed under an atmosphere of argon unless otherwise specified. All microwave reactions were conducted in a C.E.M. MARS microwave reactor at a power of 300W in an open vessel or C.E.M. Explorer 48 microwave reactor in a sealed vessel at a power of 300W.

**Figure S1. <sup>a</sup> Chiral HPLC Chromatograms of 7 and 10.**

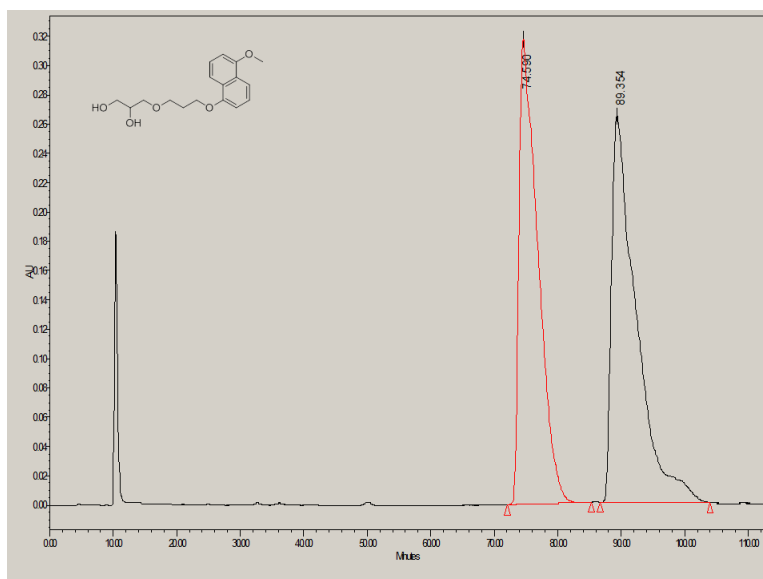

Racemic Sample

|   | Retention Time | Area      | % Area | Height  |
|---|----------------|-----------|--------|---------|
| 1 | 80.129         | 226355648 | 45.90  | 1189756 |
| 2 | 86.824         | 266826823 | 54.10  | 976579  |

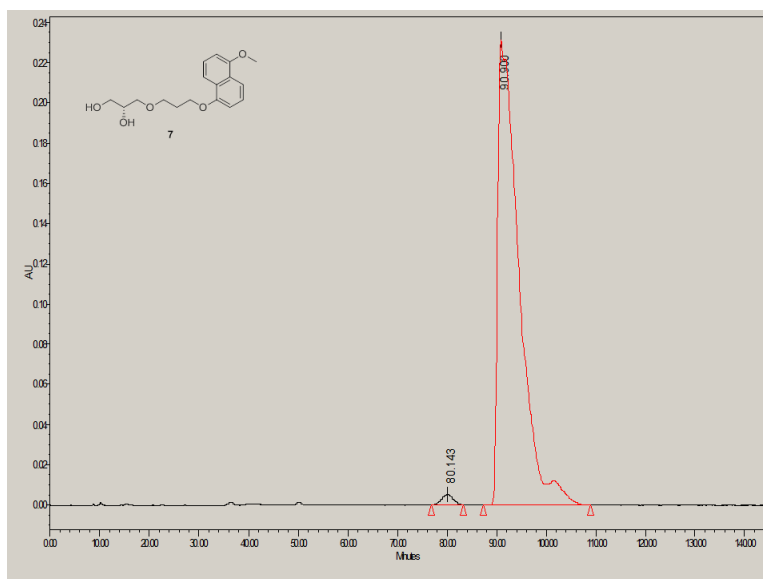

|   | Retention Time | Area     | % Area | Height |
|---|----------------|----------|--------|--------|
| 1 | 75.141         | 5187344  | 5.82   | 43704  |
| 2 | 79.664         | 83915537 | 94.18  | 401161 |

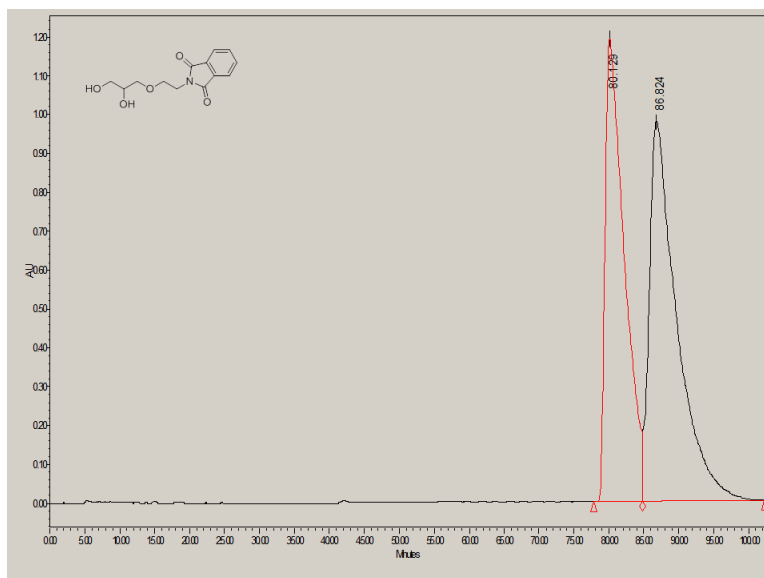

Racemic Sample

|   | Retention Time | Area     | % Area | Height |
|---|----------------|----------|--------|--------|
| 1 | 74.590         | 65668561 | 48.10  | 316870 |
| 2 | 89.354         | 70865309 | 51.90  | 263866 |

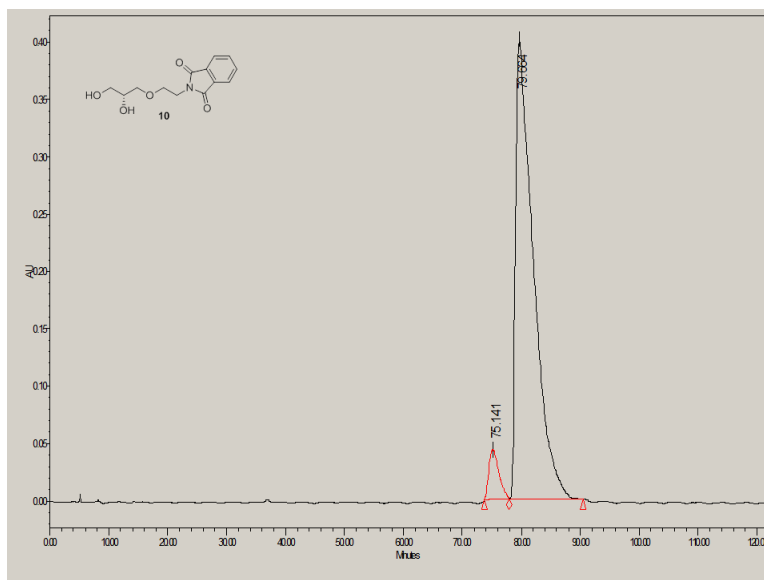

|   | Retention Time | Area     | % Area | Height |
|---|----------------|----------|--------|--------|
| 1 | 80.143         | 824716   | 1.19   | 5290   |
| 2 | 90.900         | 68763657 | 98.81  | 231161 |

<sup>a</sup> Enantiomeric excess was determined by HPLC on a Chiralcel ODH column (0.46 cm I.D. x 25 cmL); eluent, hexane:*i*-PrOH, 95:5 v/v; flow rate, 1.0 mL/min; UV at 254 nm; room temperature.

**Figure S2.**  $^1\text{H}$  NMR ( $\text{CDCl}_3$ ) of **1**

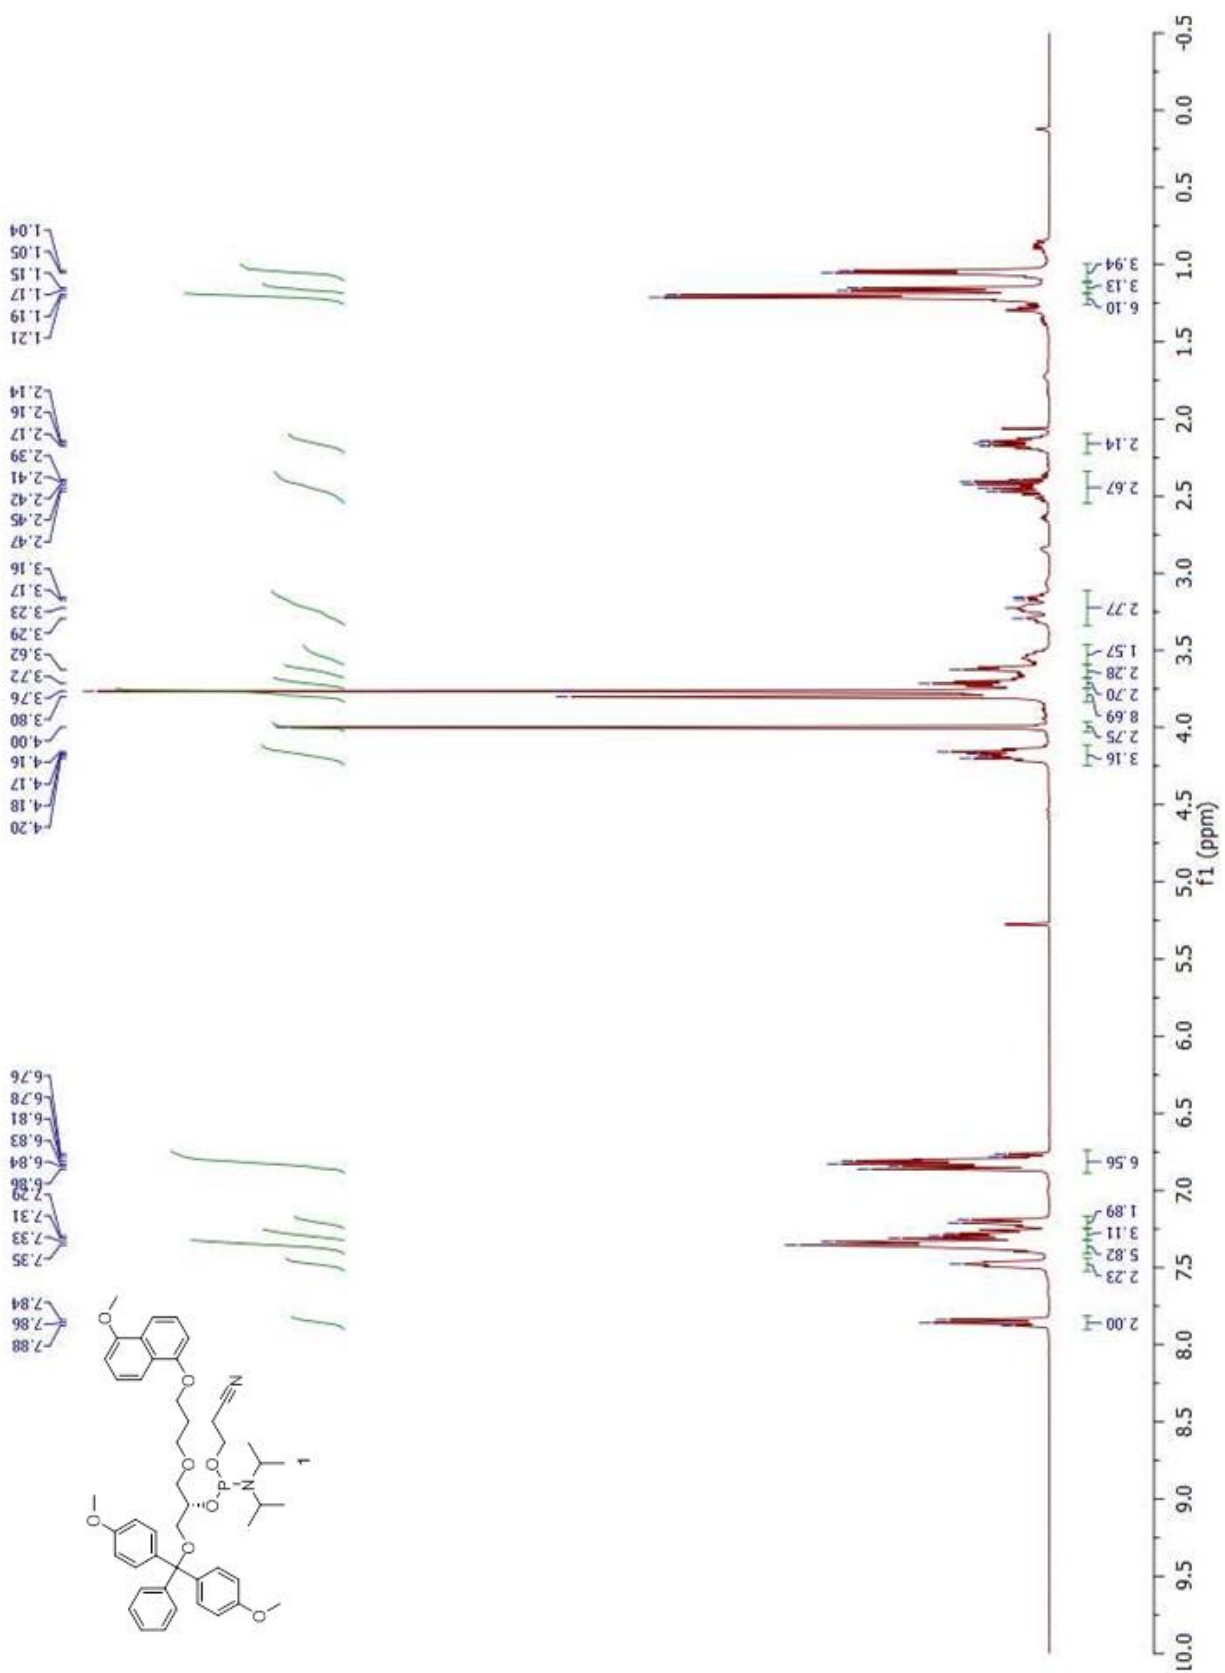

**Figure S3.**  $^1\text{H}$  NMR ( $\text{CDCl}_3$ ) of **2**

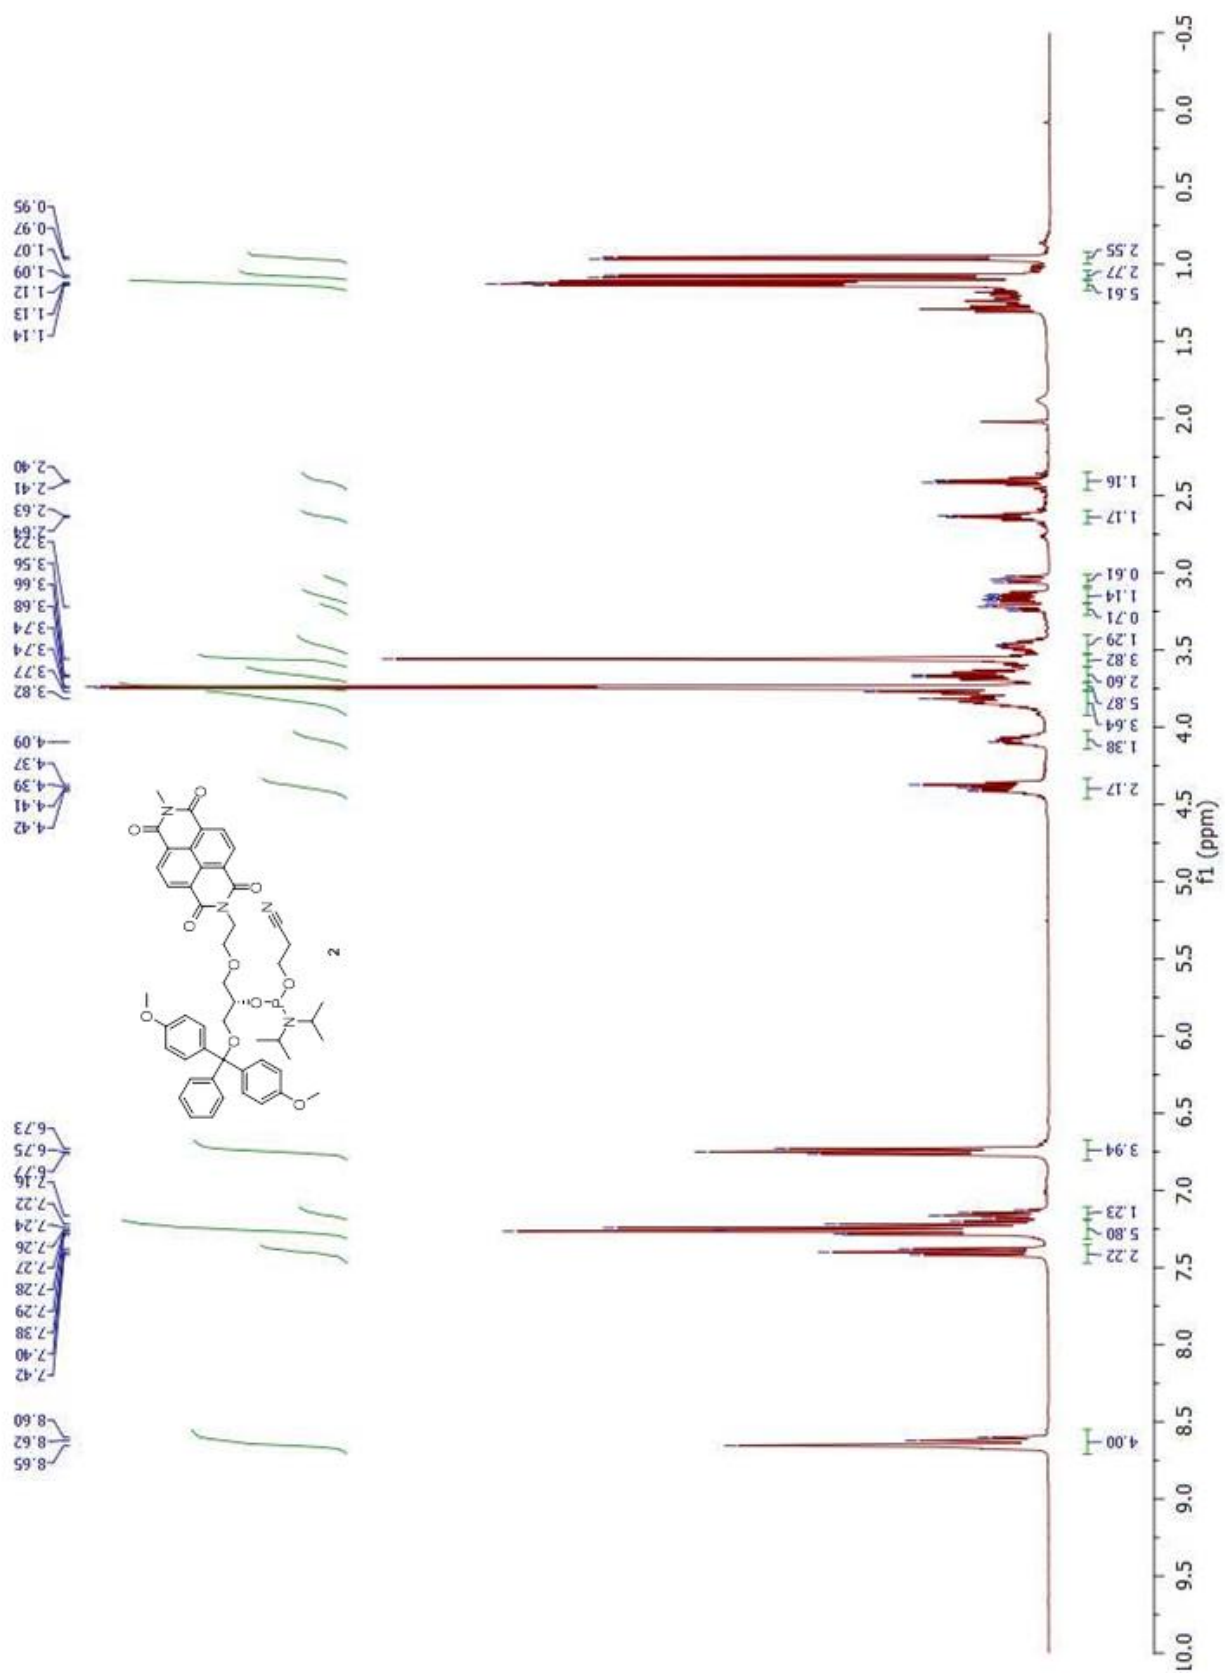

**Figure S4.**  $^1\text{H}$  NMR ( $\text{CDCl}_3$ ) of **3**

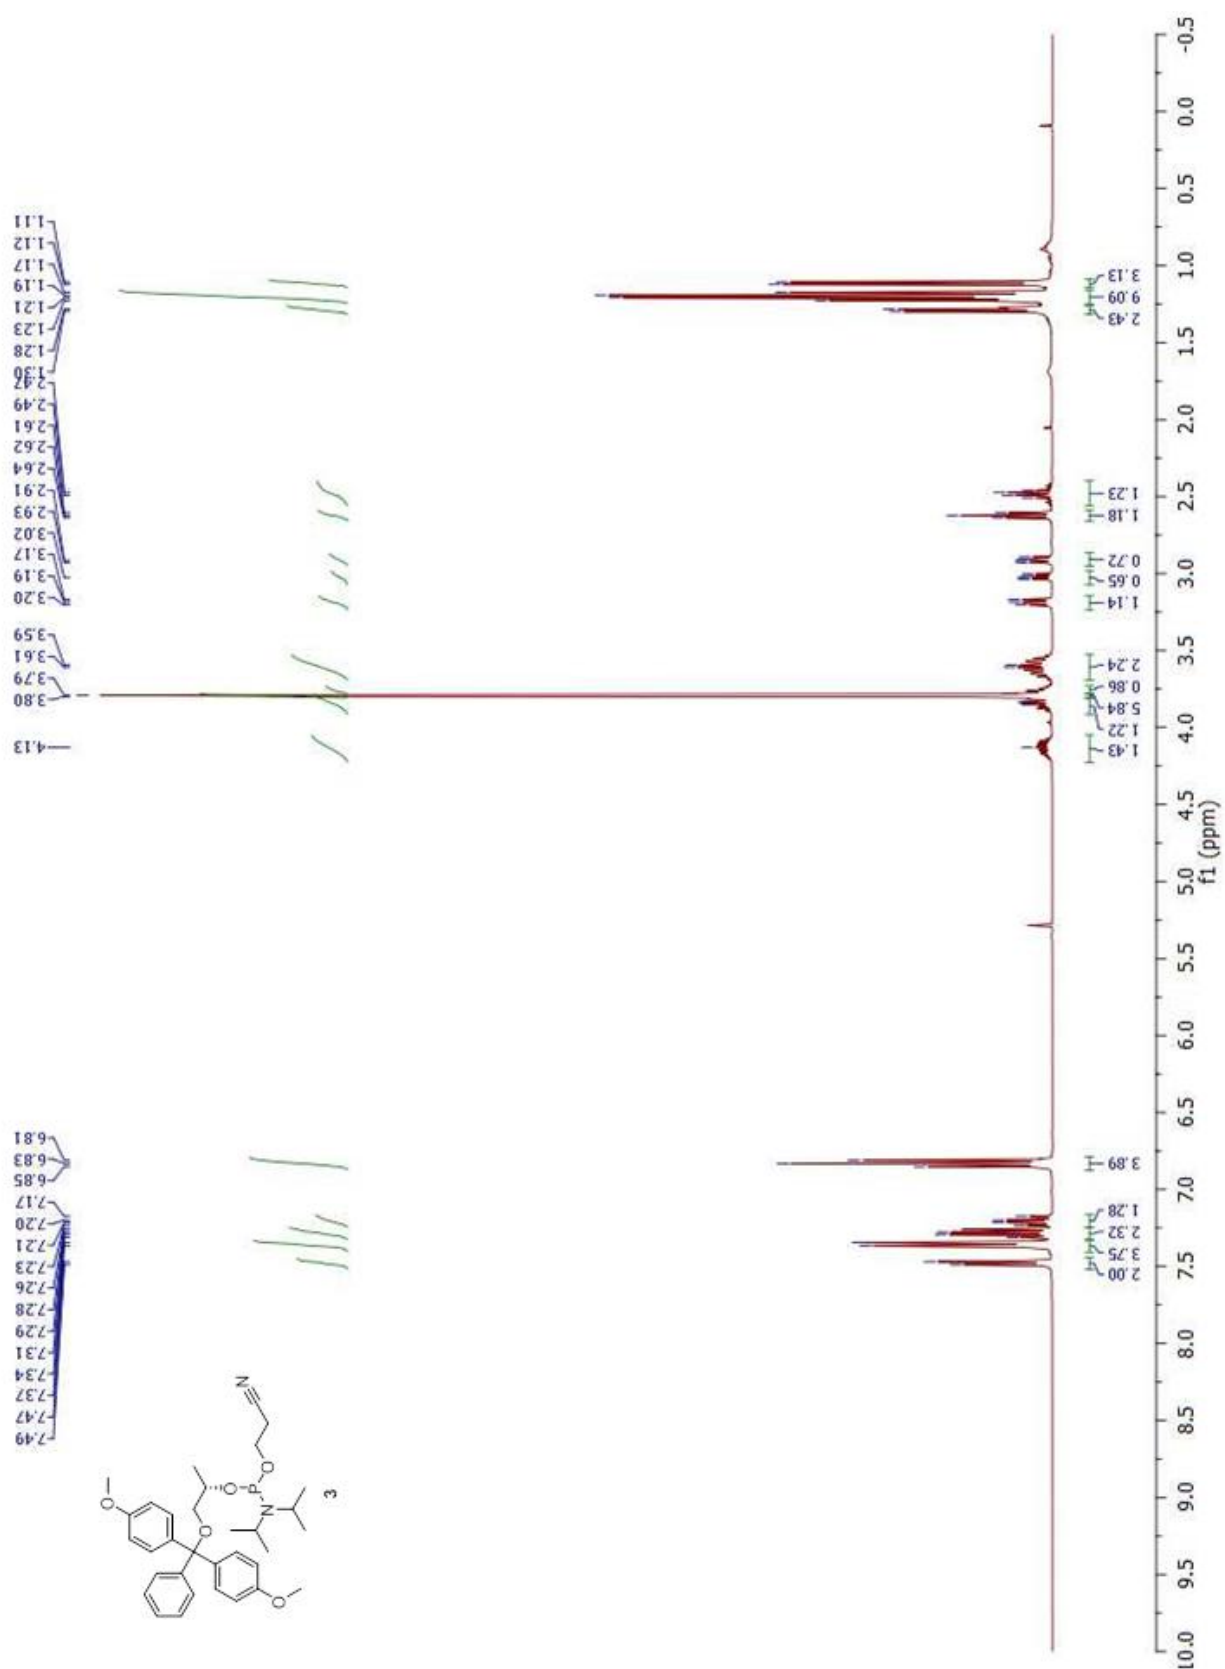

**Figure S5.**  $^1\text{H}$  NMR ( $\text{CDCl}_3$ ) of **5**

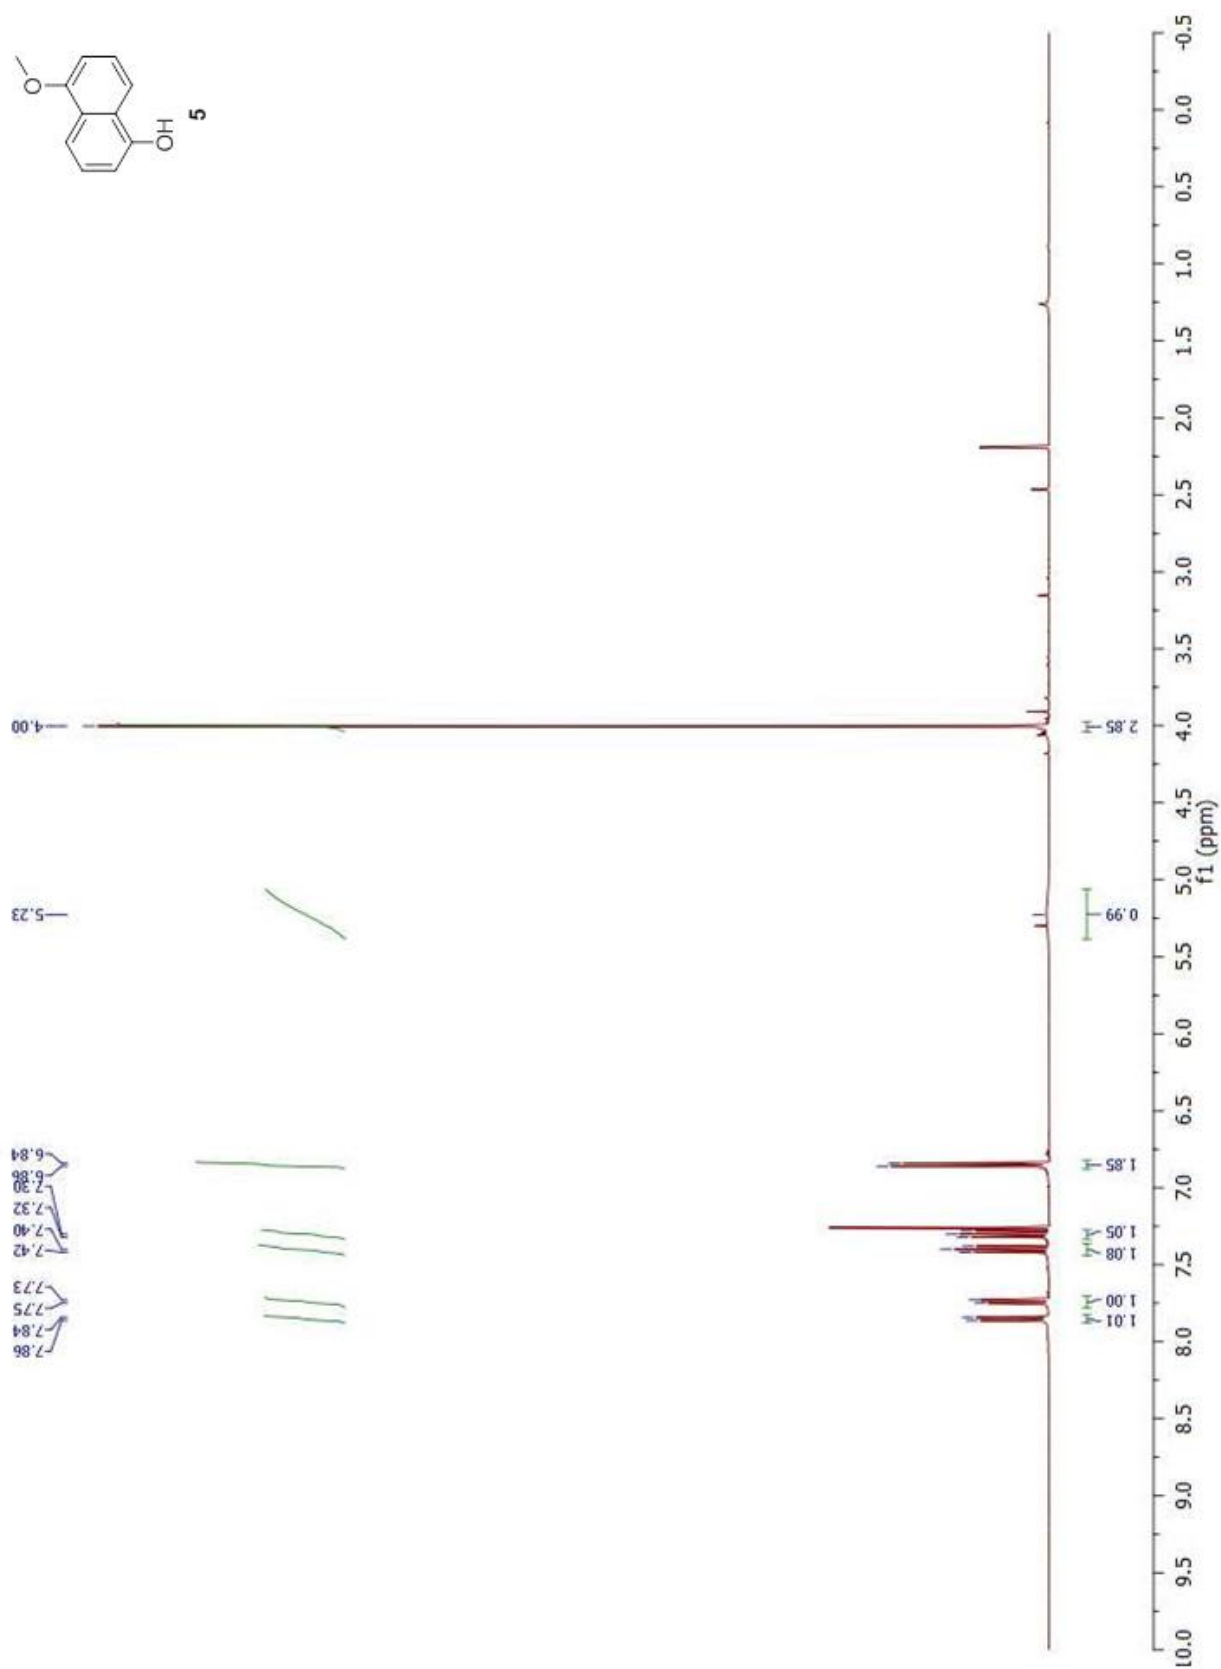



**Figure S6.**  $^1\text{H}$  NMR ( $\text{CDCl}_3$ ) of **6**

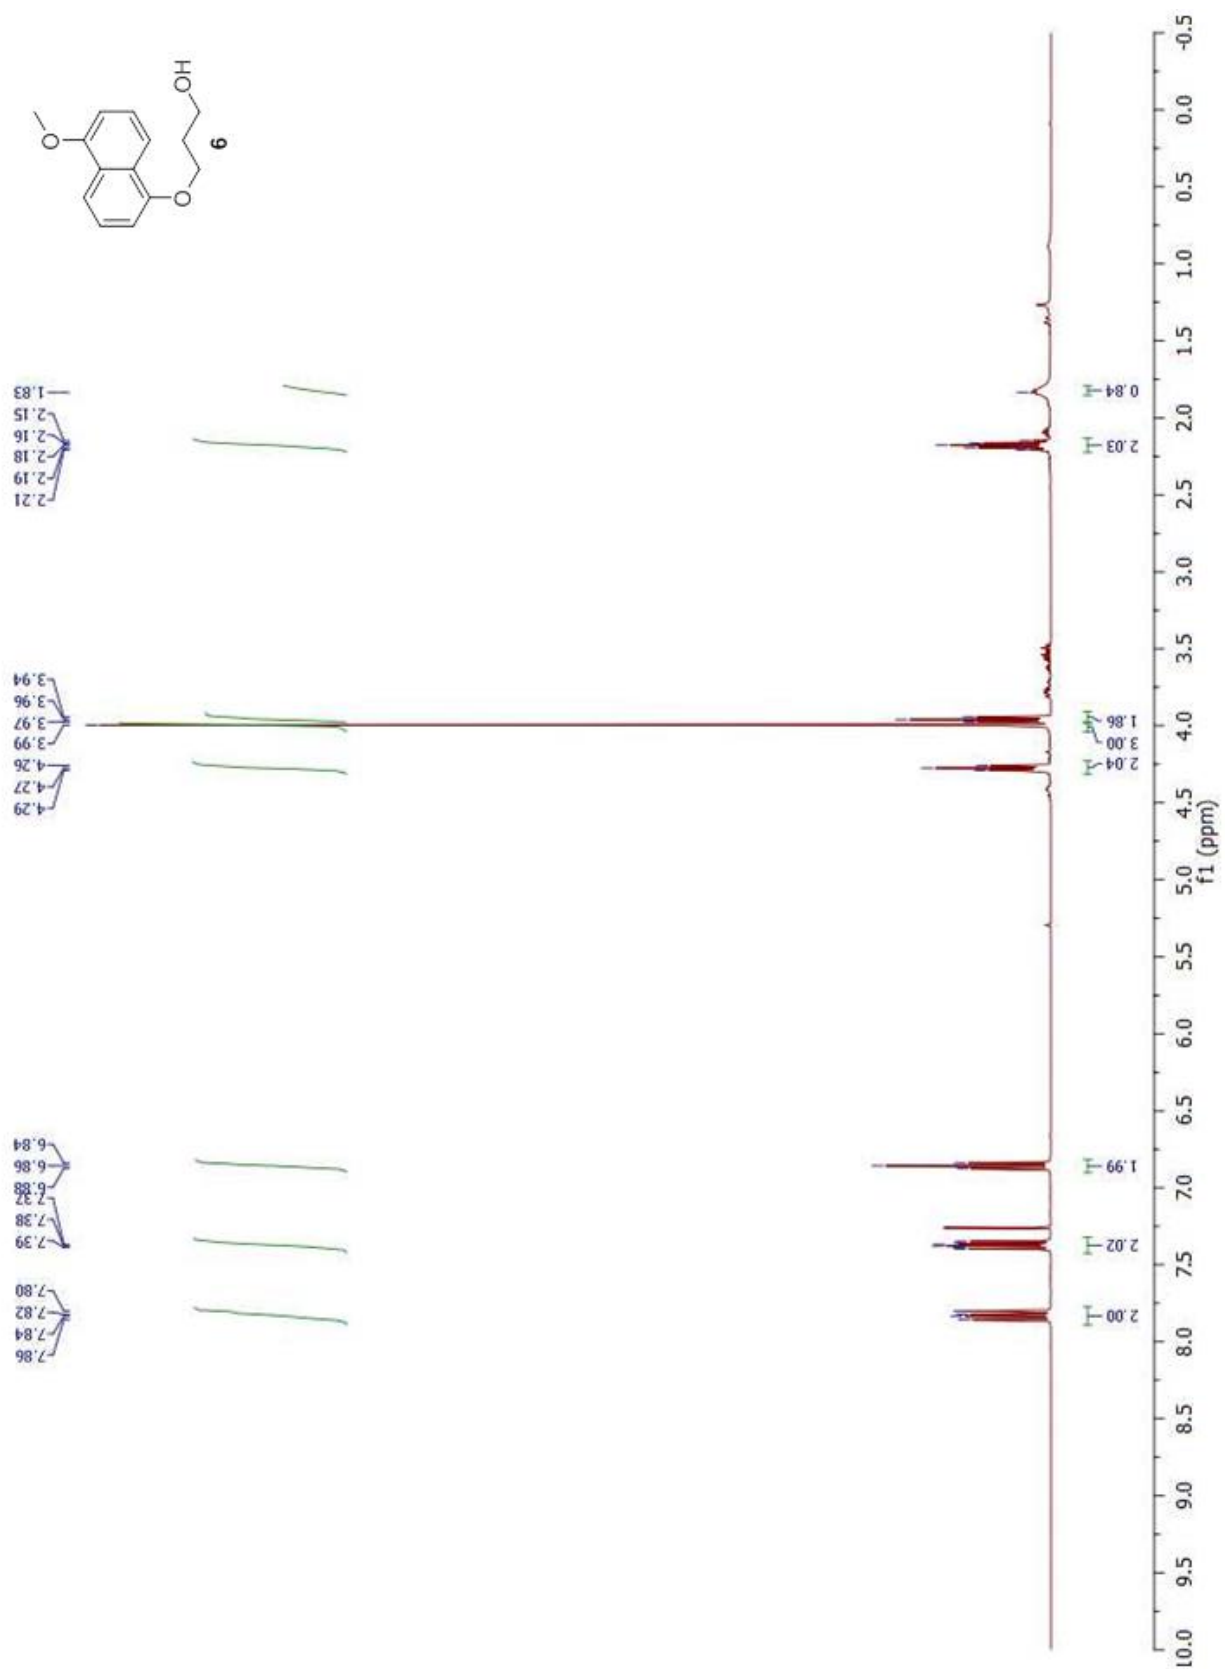

**Figure S7.**  $^1\text{H}$  NMR ( $\text{CDCl}_3$ ) of **7**

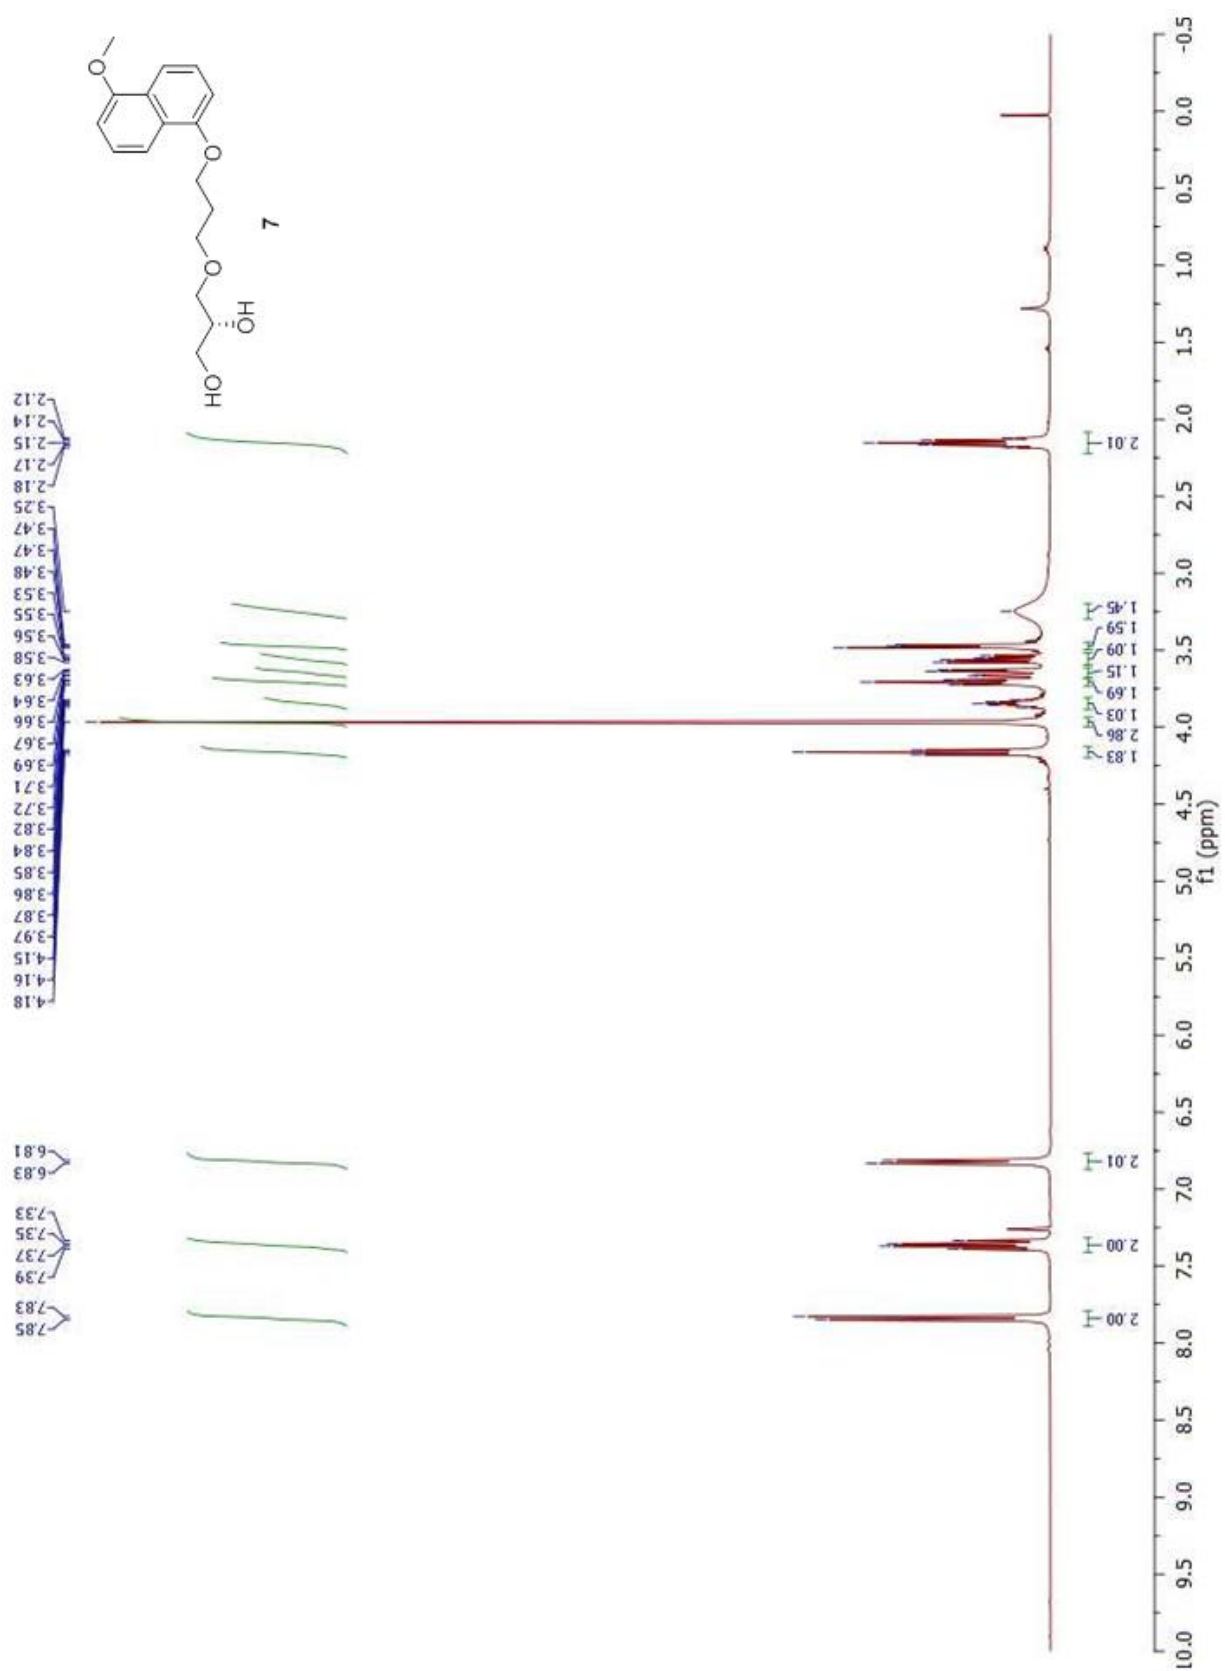

**Figure S8.**  $^1\text{H}$  NMR ( $\text{CDCl}_3$ ) of **8**

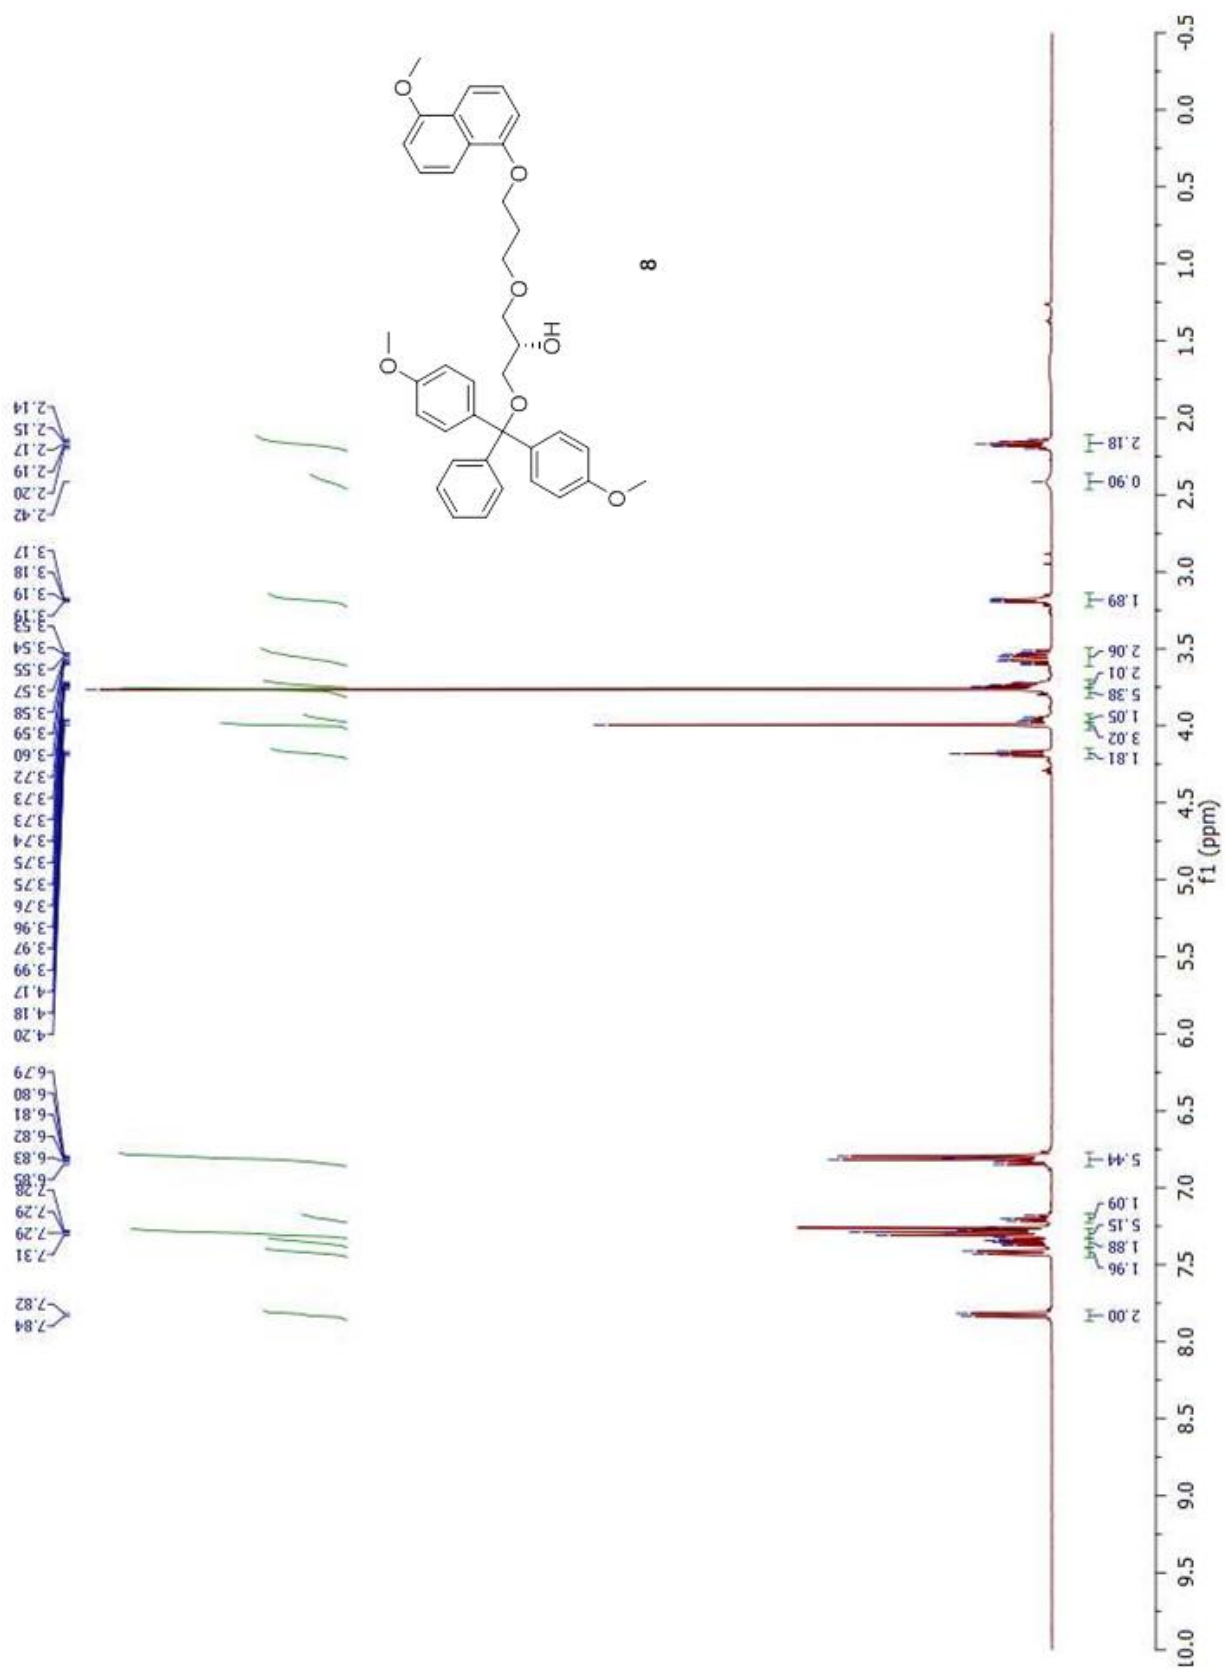

**Figure S9.**  $^1\text{H}$  NMR ( $\text{CDCl}_3$ ) of **10**

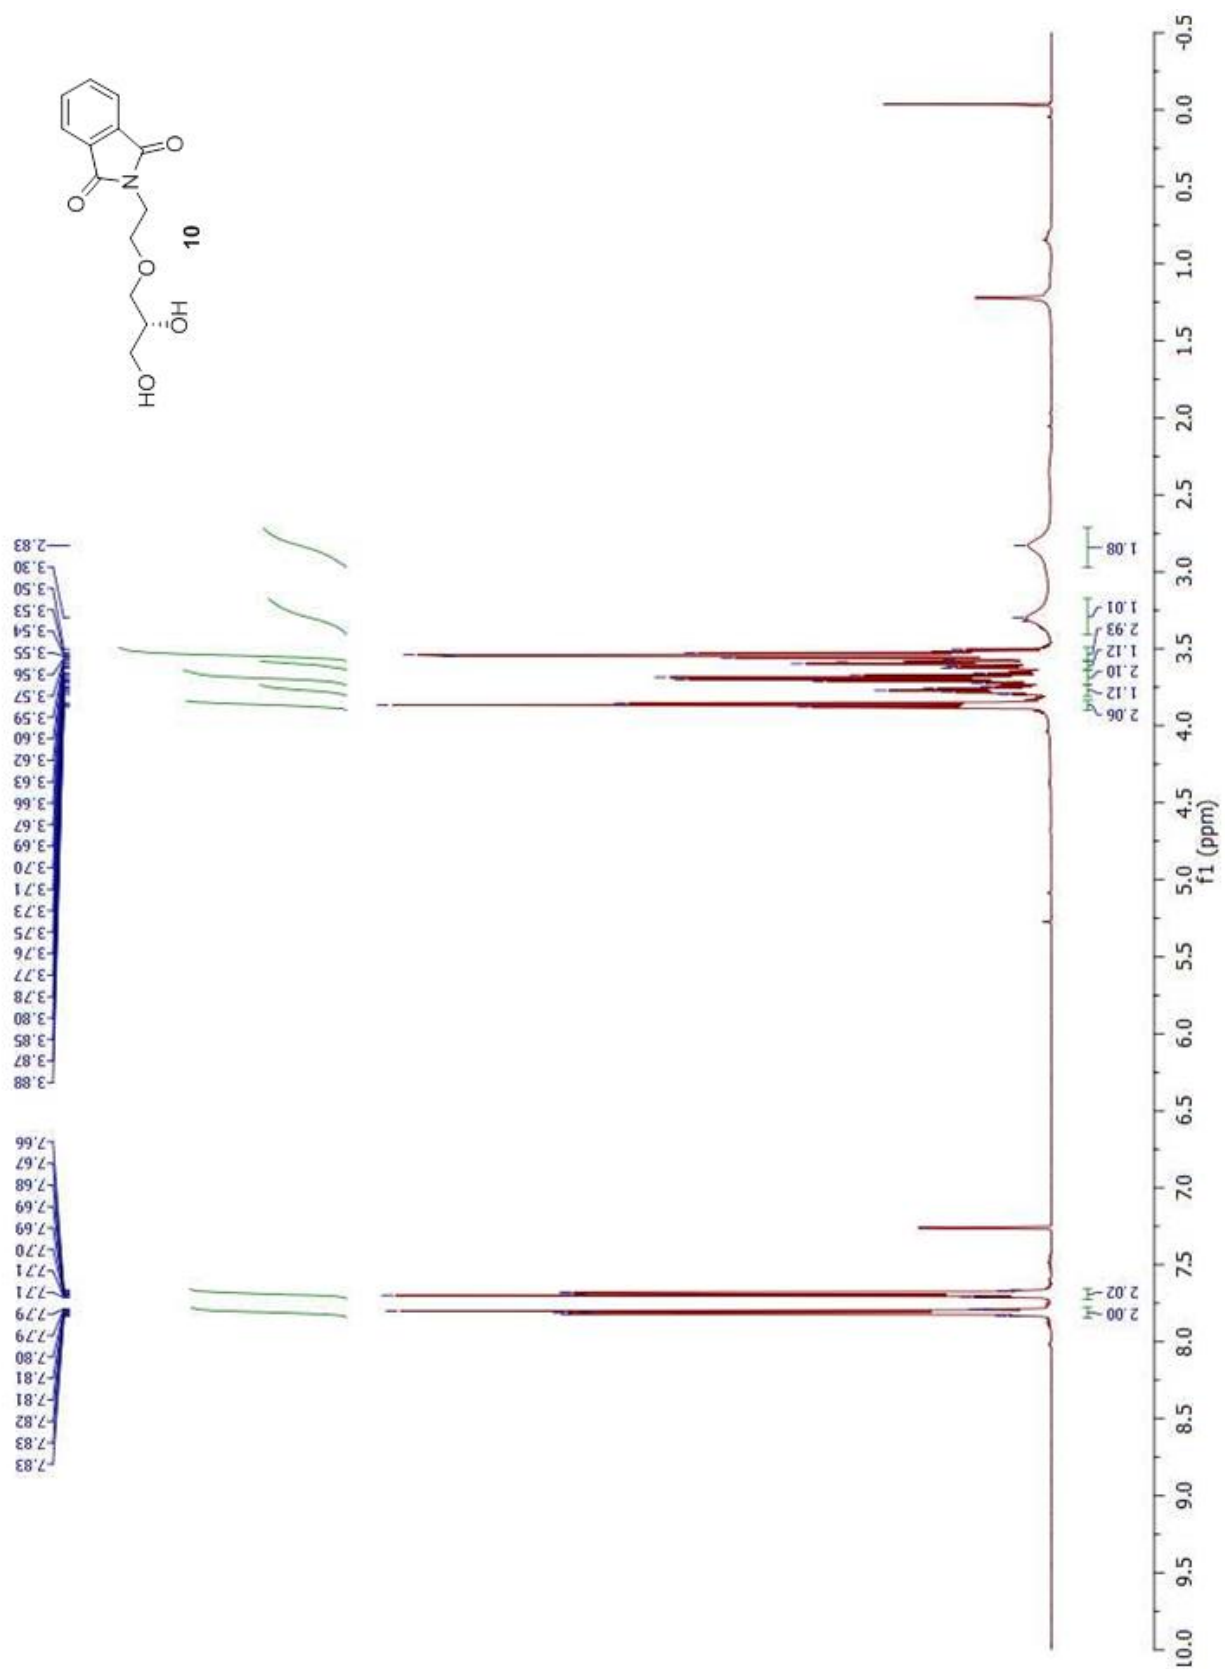

Chemical structure of compound 11 is shown in the top left. The <sup>1</sup>H NMR spectrum (CDCl<sub>3</sub>) is displayed below, with chemical shifts (ppm) on the x-axis ranging from 0.5 to 10.0. Integration values are provided for several peak regions.

Chemical structure of 11: COc1ccc(cc1)Oc2ccc(cc2)C(c3ccccc3)(c4cc(OC)ccc4)COC[C@H](O)COc5cc6c(cc5)nc(=O)c7ccccc76=O

<sup>1</sup>H NMR spectrum (CDCl<sub>3</sub>) data:

| Chemical Shift (ppm) | Integration |
|----------------------|-------------|
| 0.61                 | 0.61        |
| 2.24                 | 2.04        |
| 2.56                 | 1.04        |
| 3.61                 | 2.04        |
| 3.73                 | 3.73        |
| 5.72                 | 2.02        |
| 5.77                 | 0.99        |
| 7.21                 | 2.00        |

**Figure S11.**  $^1\text{H}$  NMR ( $\text{CDCl}_3$ ) of **12**

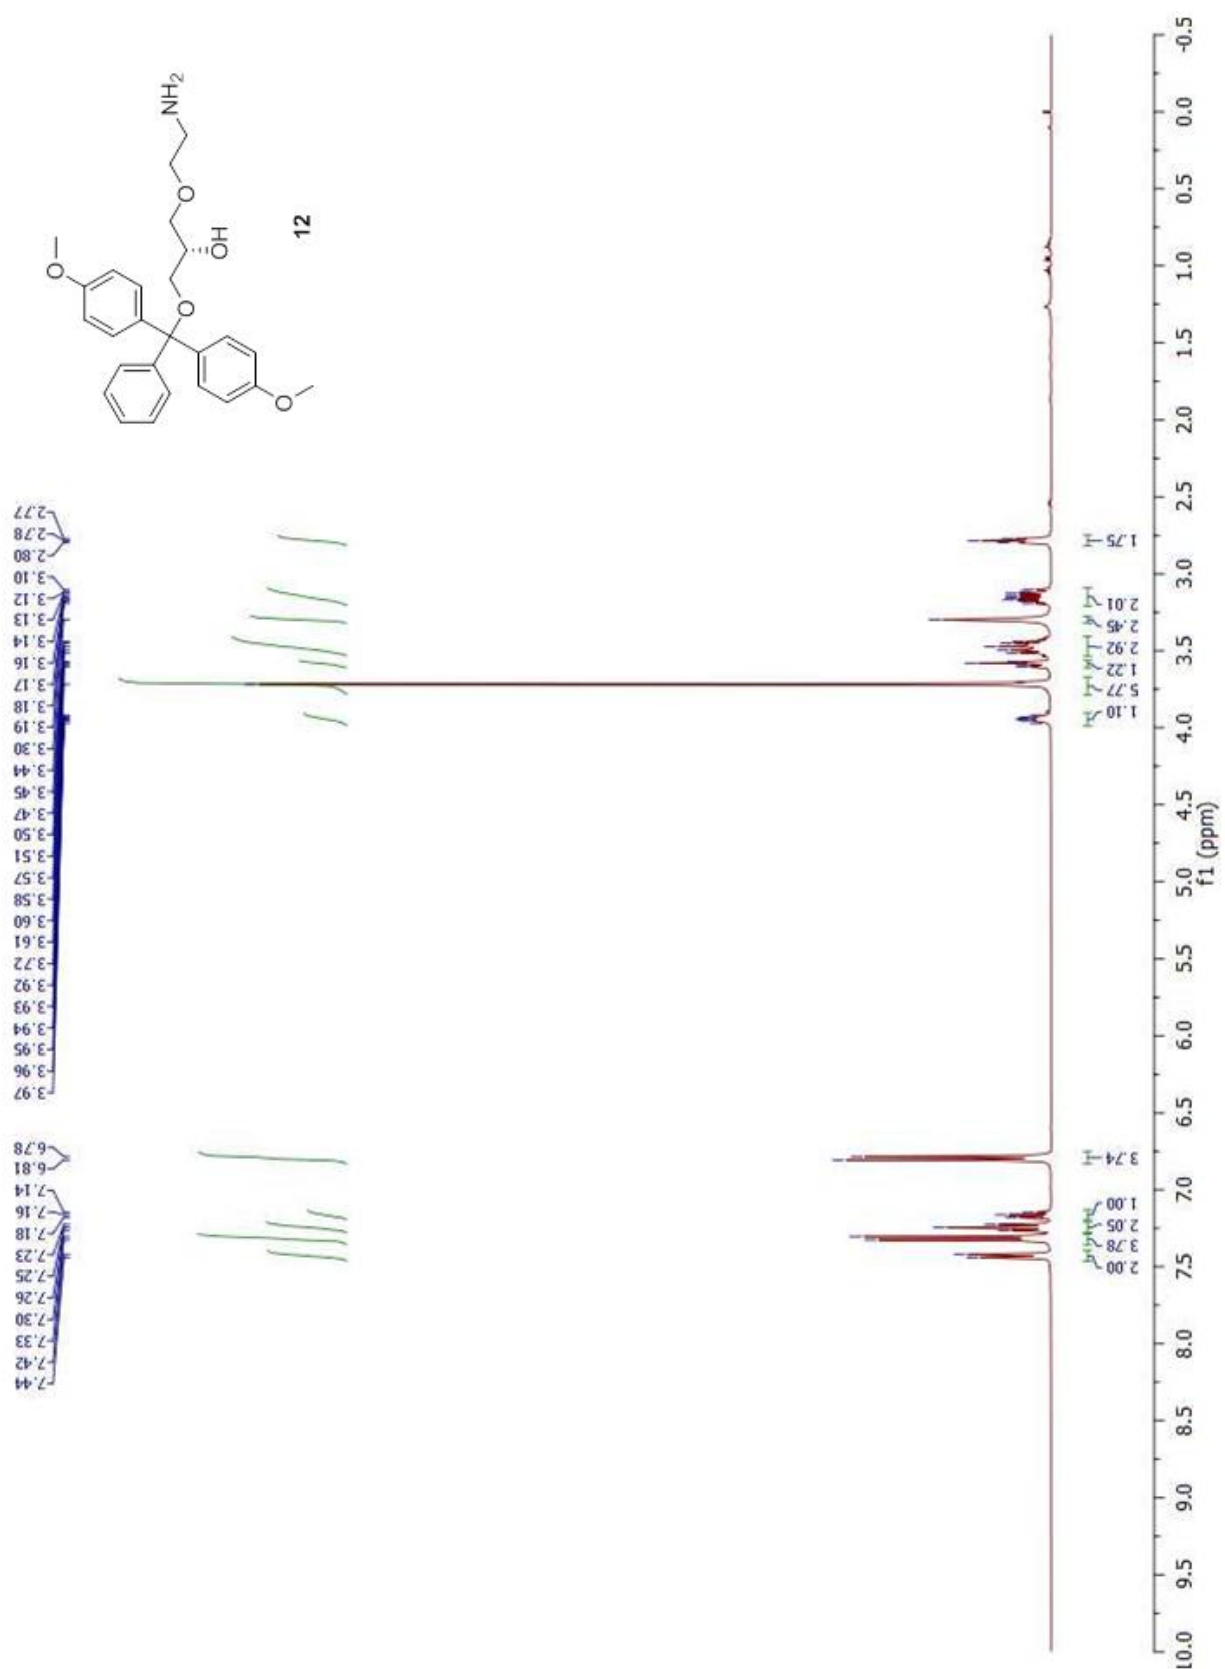

**Figure S12.**  $^1\text{H}$  NMR ( $\text{CDCl}_3$ ) of **14**

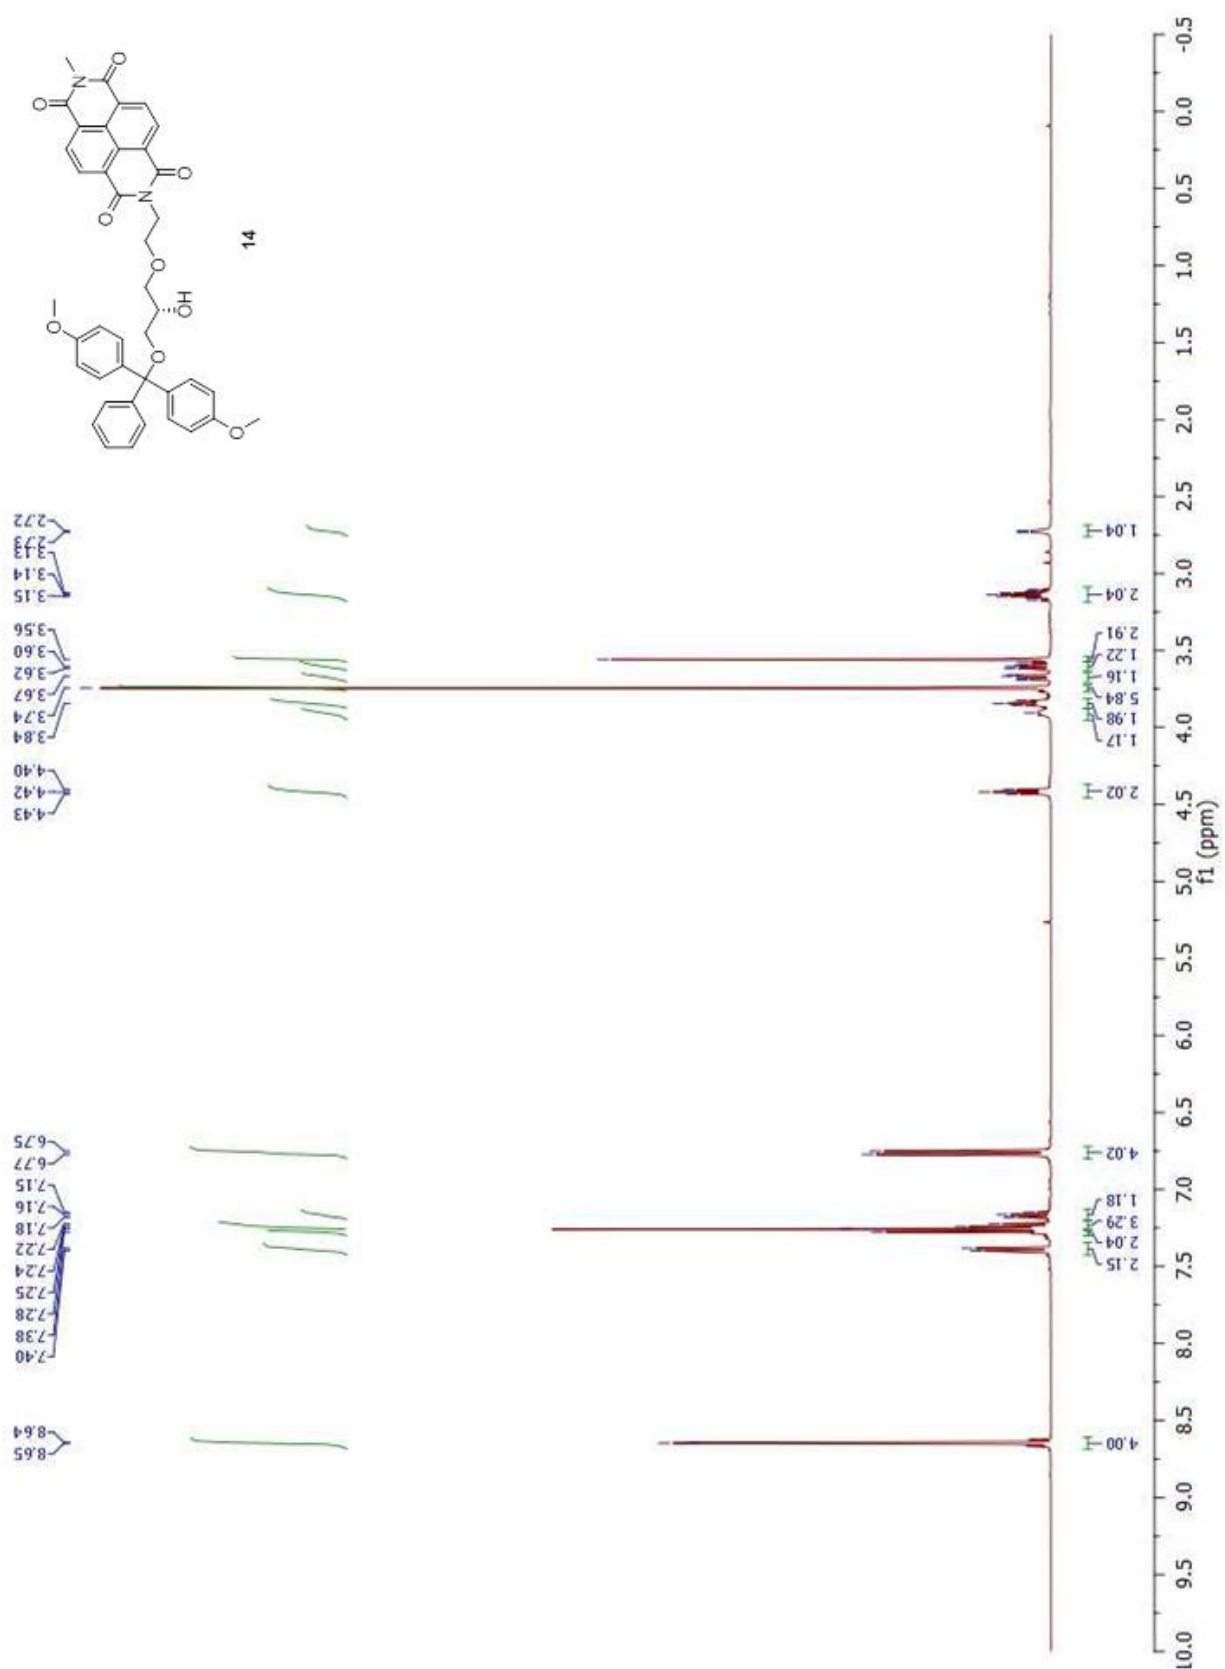

**Figure S13.**  $^{13}\text{C}$  NMR ( $\text{CDCl}_3$ ) of **1**

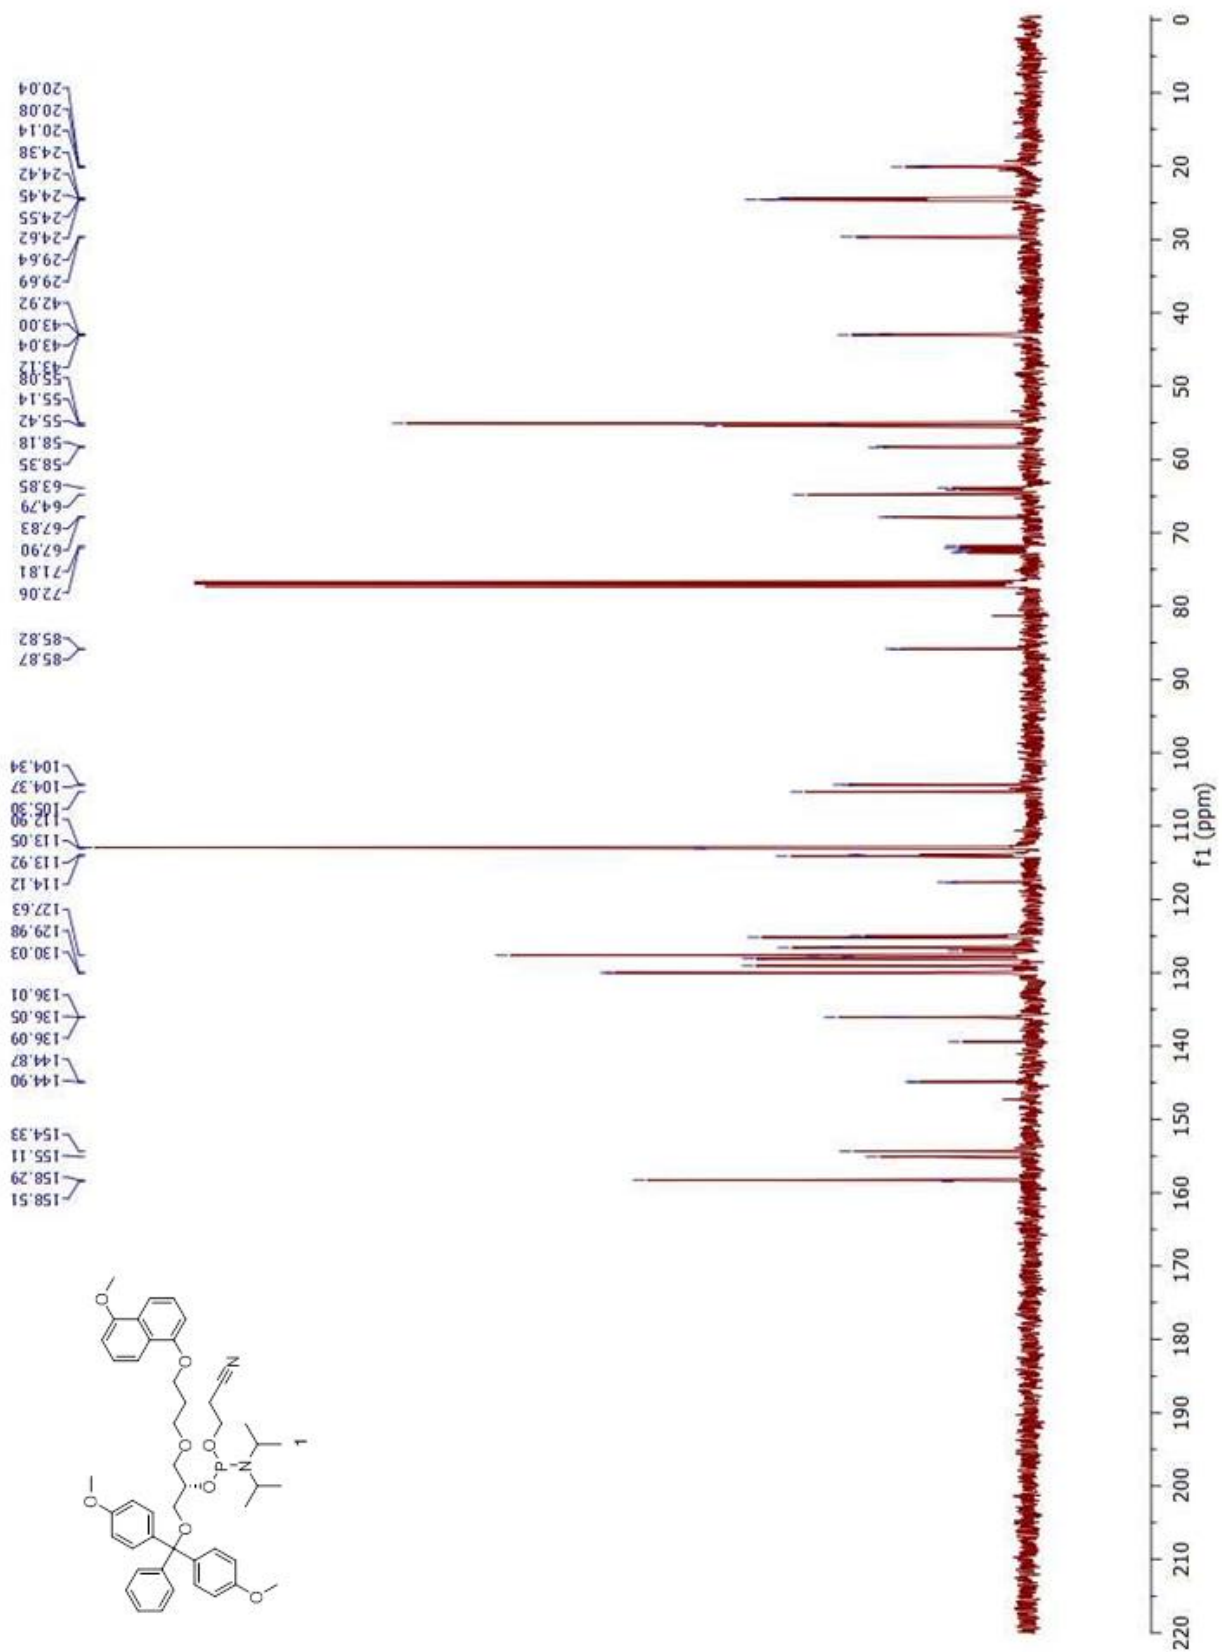



**Figure S14.**  $^{13}\text{C}$  NMR ( $\text{CDCl}_3$ ) of **2**

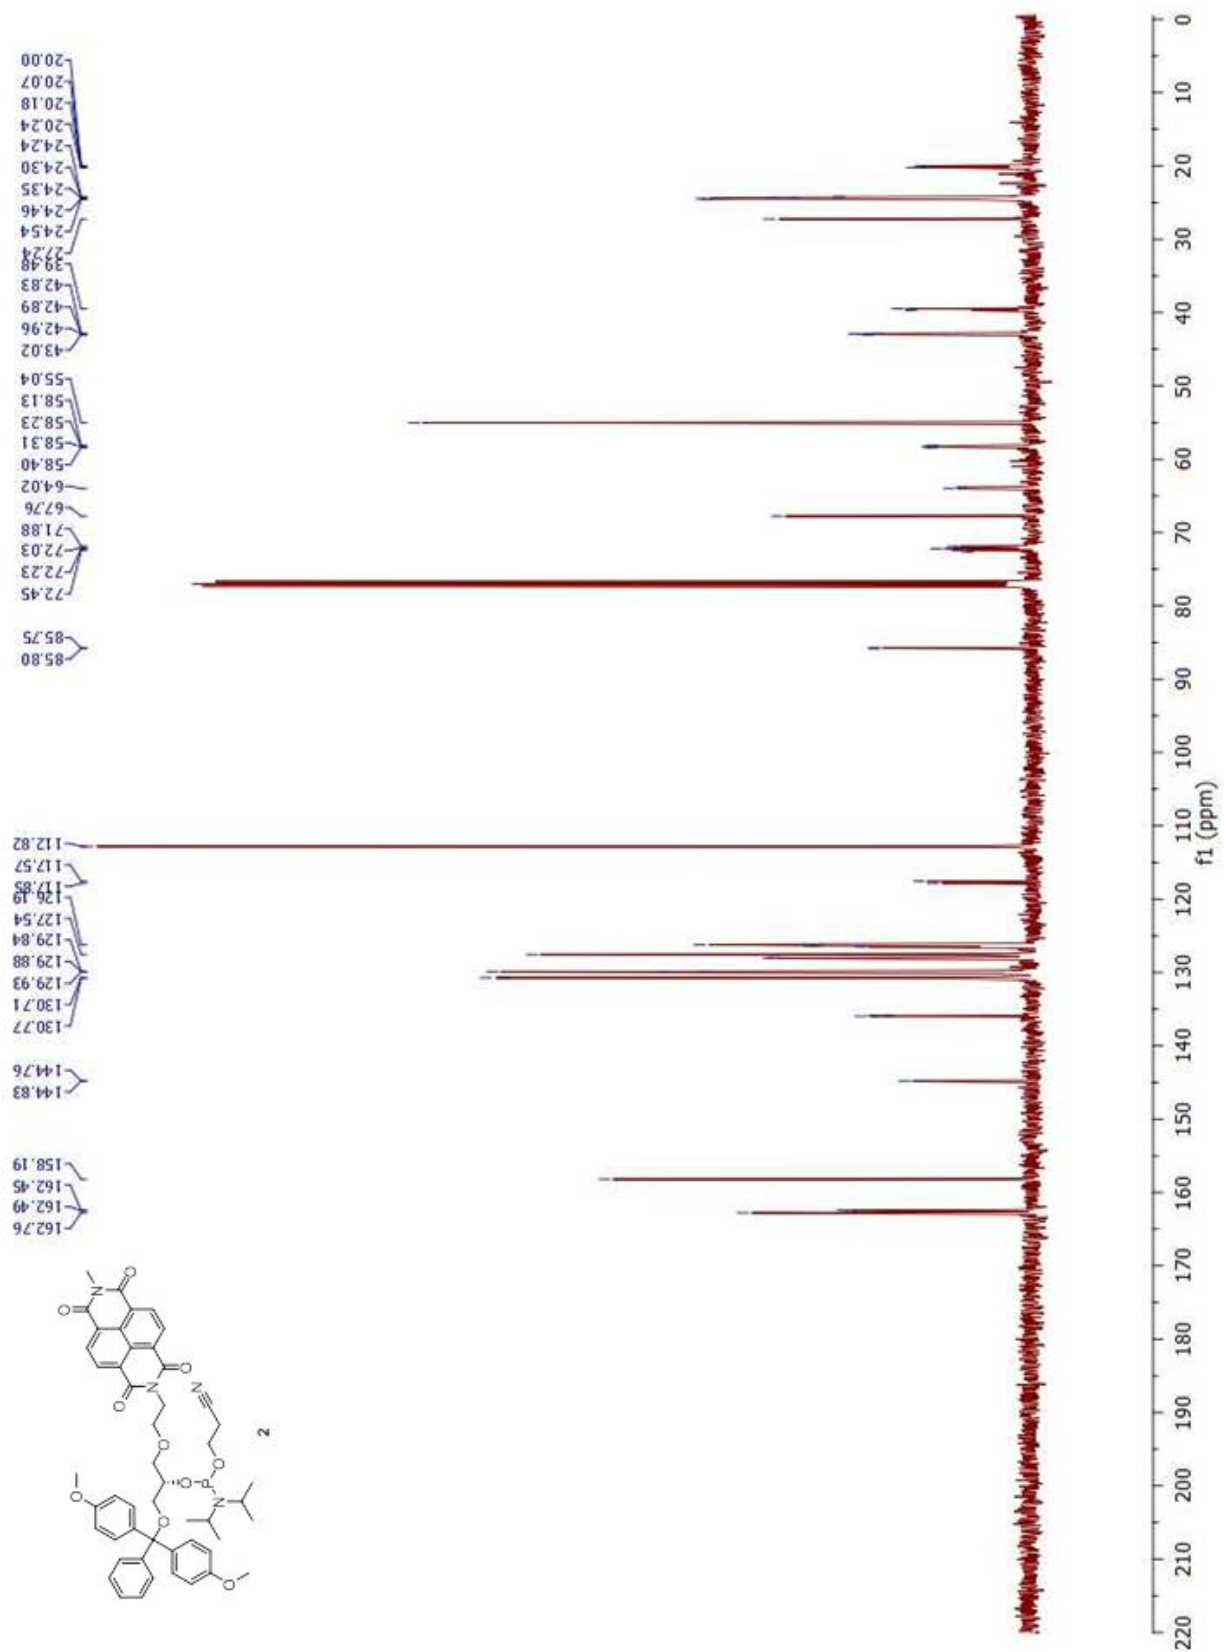

**Figure S15.**  $^{13}\text{C}$  NMR ( $\text{CDCl}_3$ ) of **3**

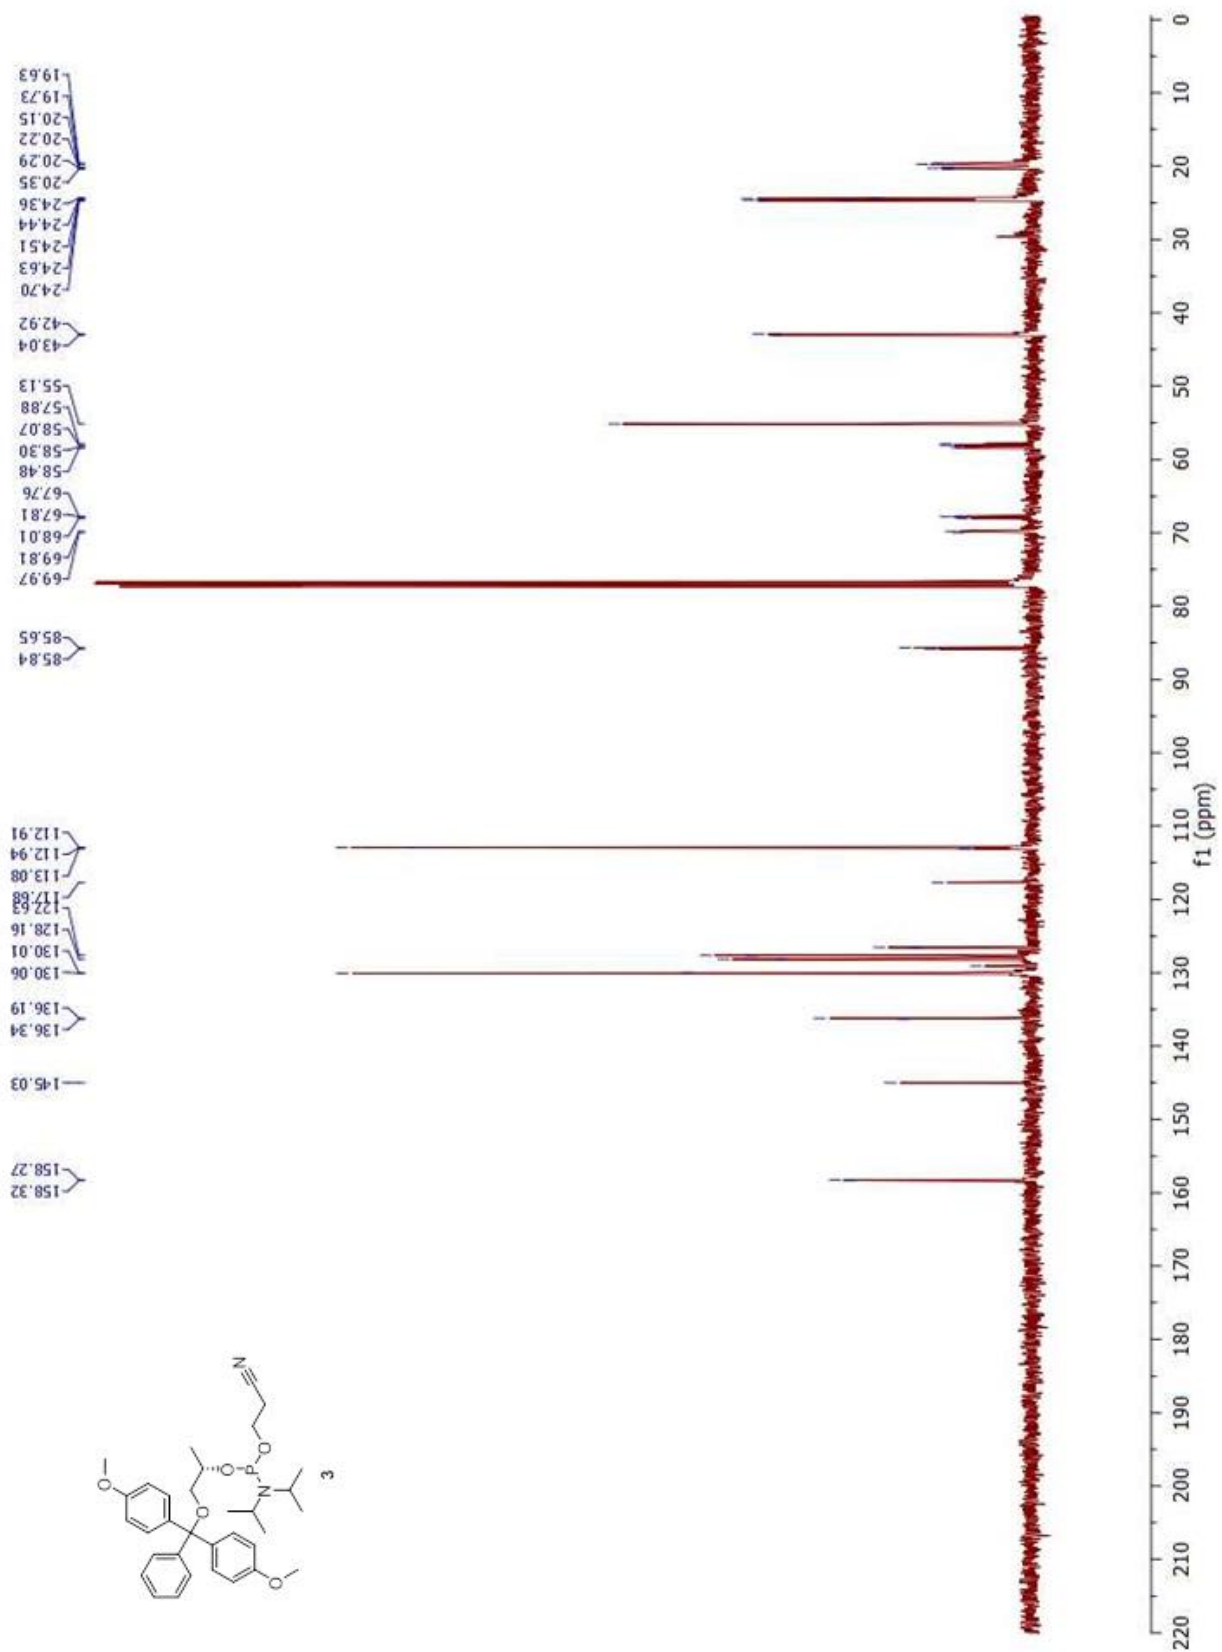

**Figure S16.**  $^{13}\text{C}$  NMR ( $\text{CDCl}_3$ ) of **5**

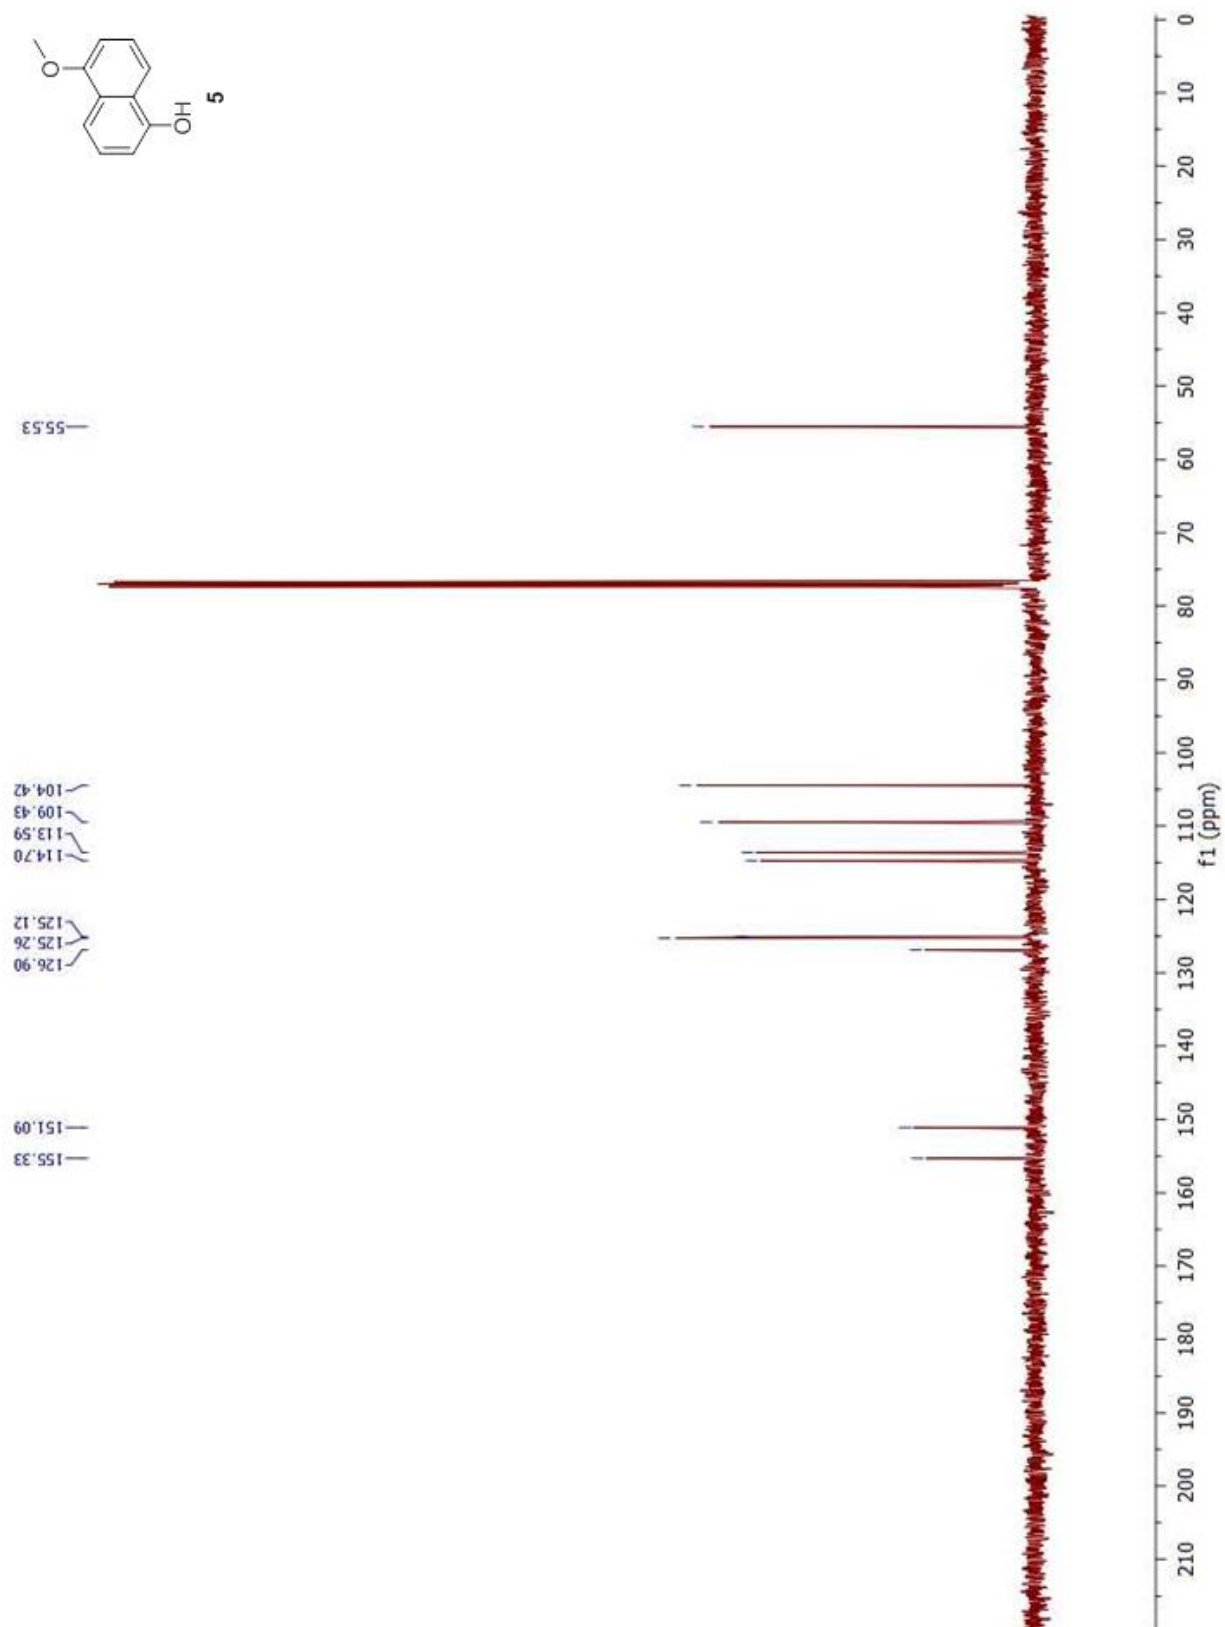

**Figure S17.**  $^{13}\text{C}$  NMR ( $\text{CDCl}_3$ ) of **6**

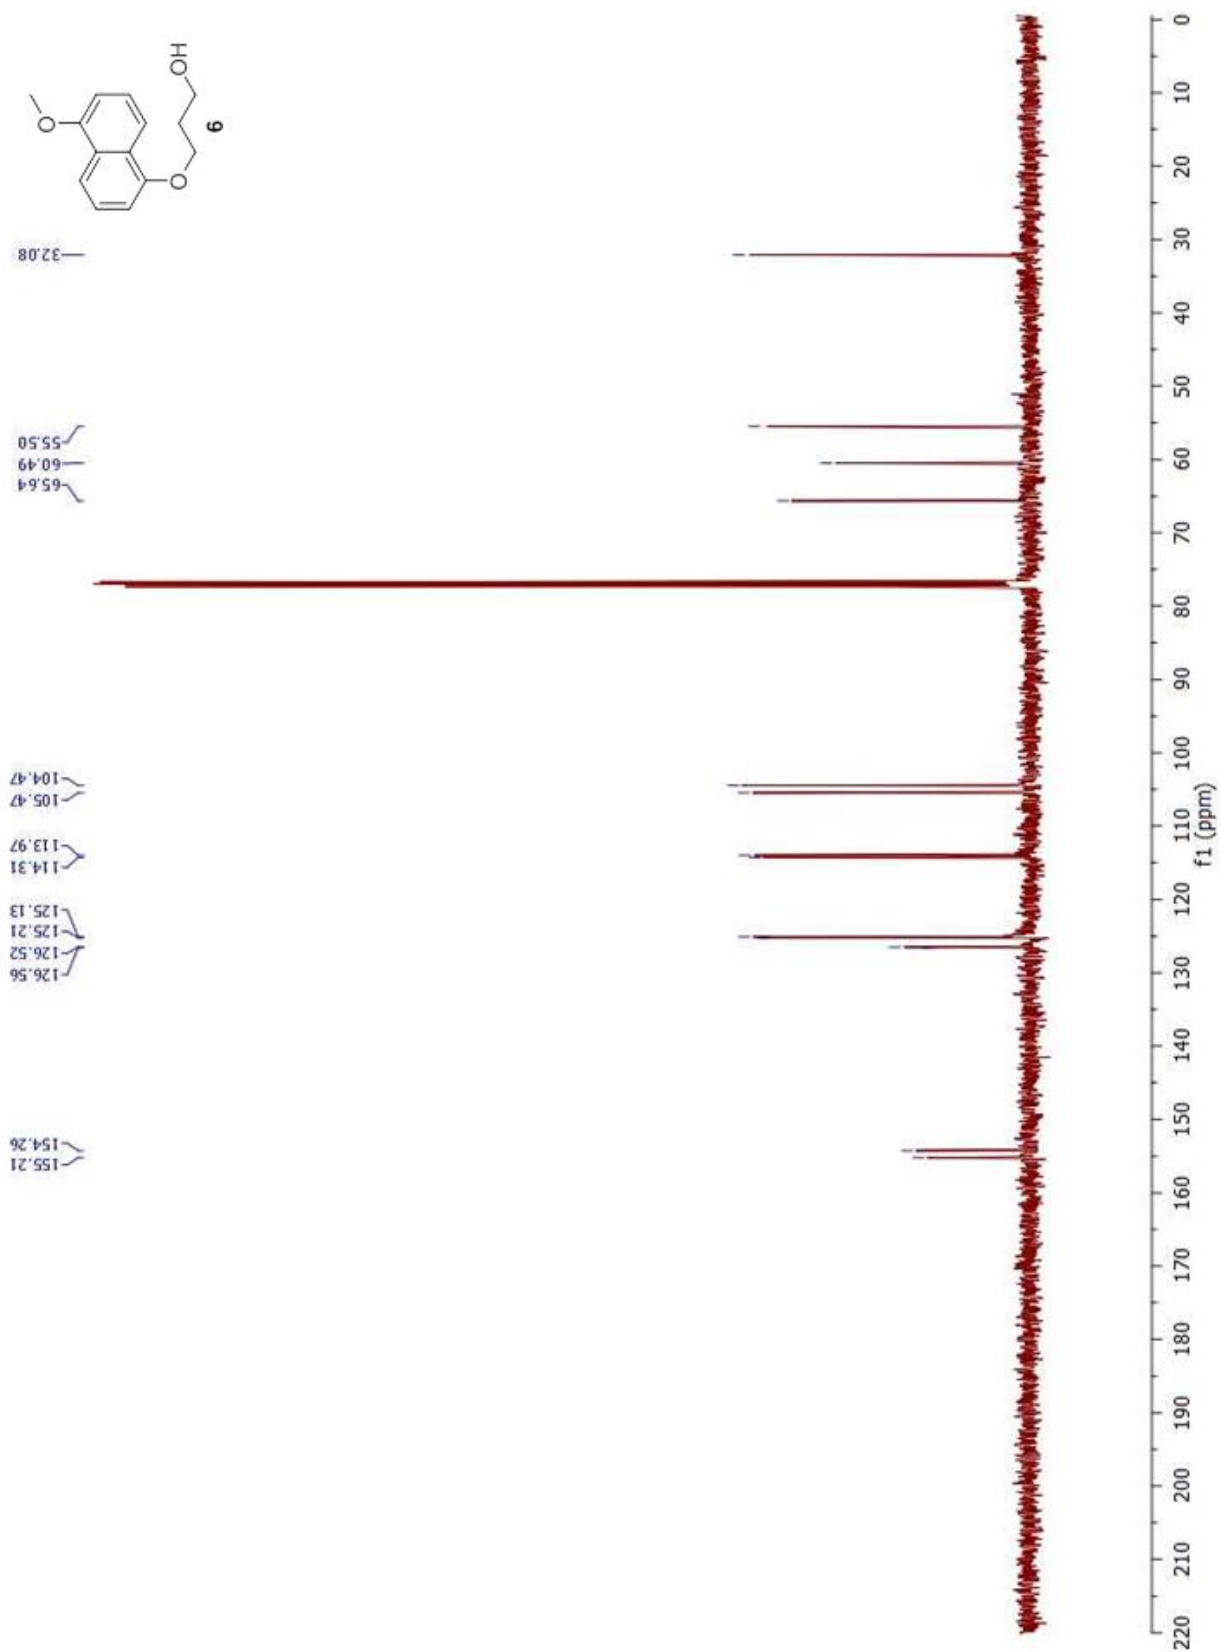

**Figure S18.**  $^{13}\text{C}$  NMR ( $\text{CDCl}_3$ ) of **7**

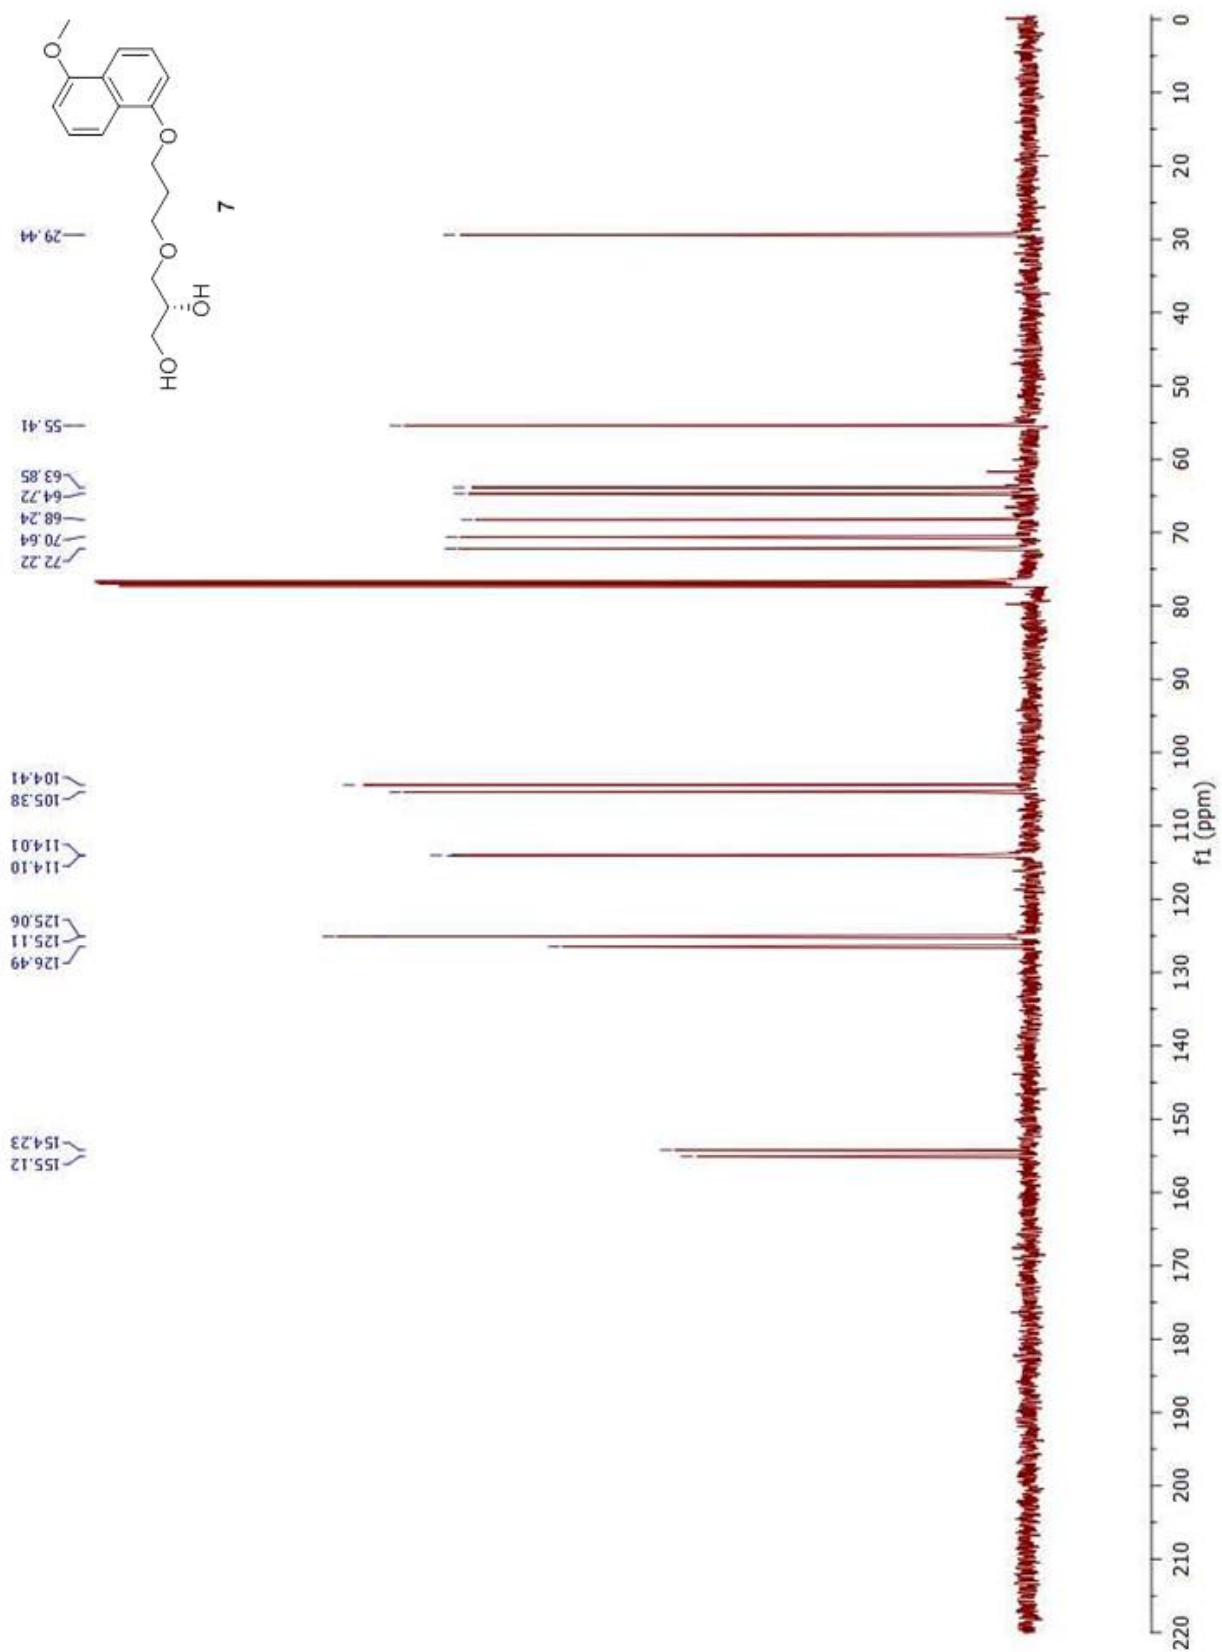

**Figure S19.**  $^{13}\text{C}$  NMR ( $\text{CDCl}_3$ ) of **8**

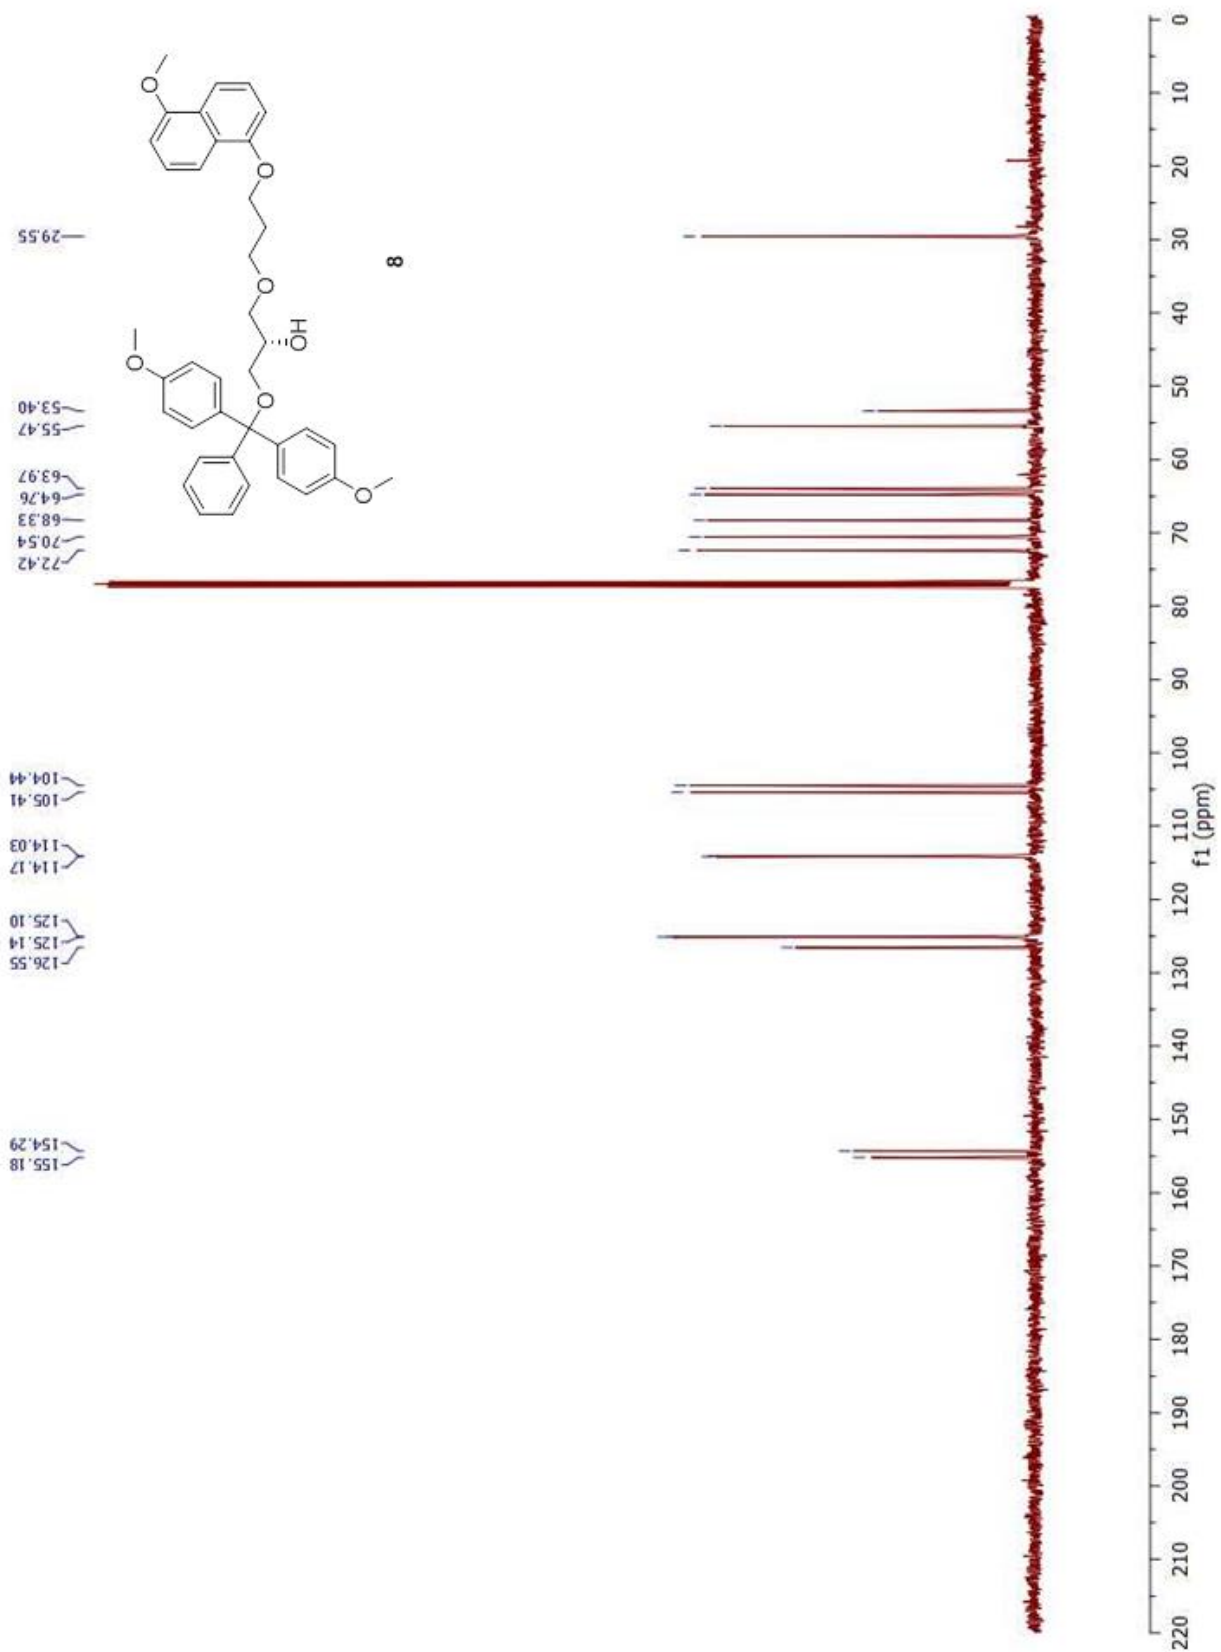

**Figure S20.**  $^{13}\text{C}$  NMR ( $\text{CDCl}_3$ ) of **10**

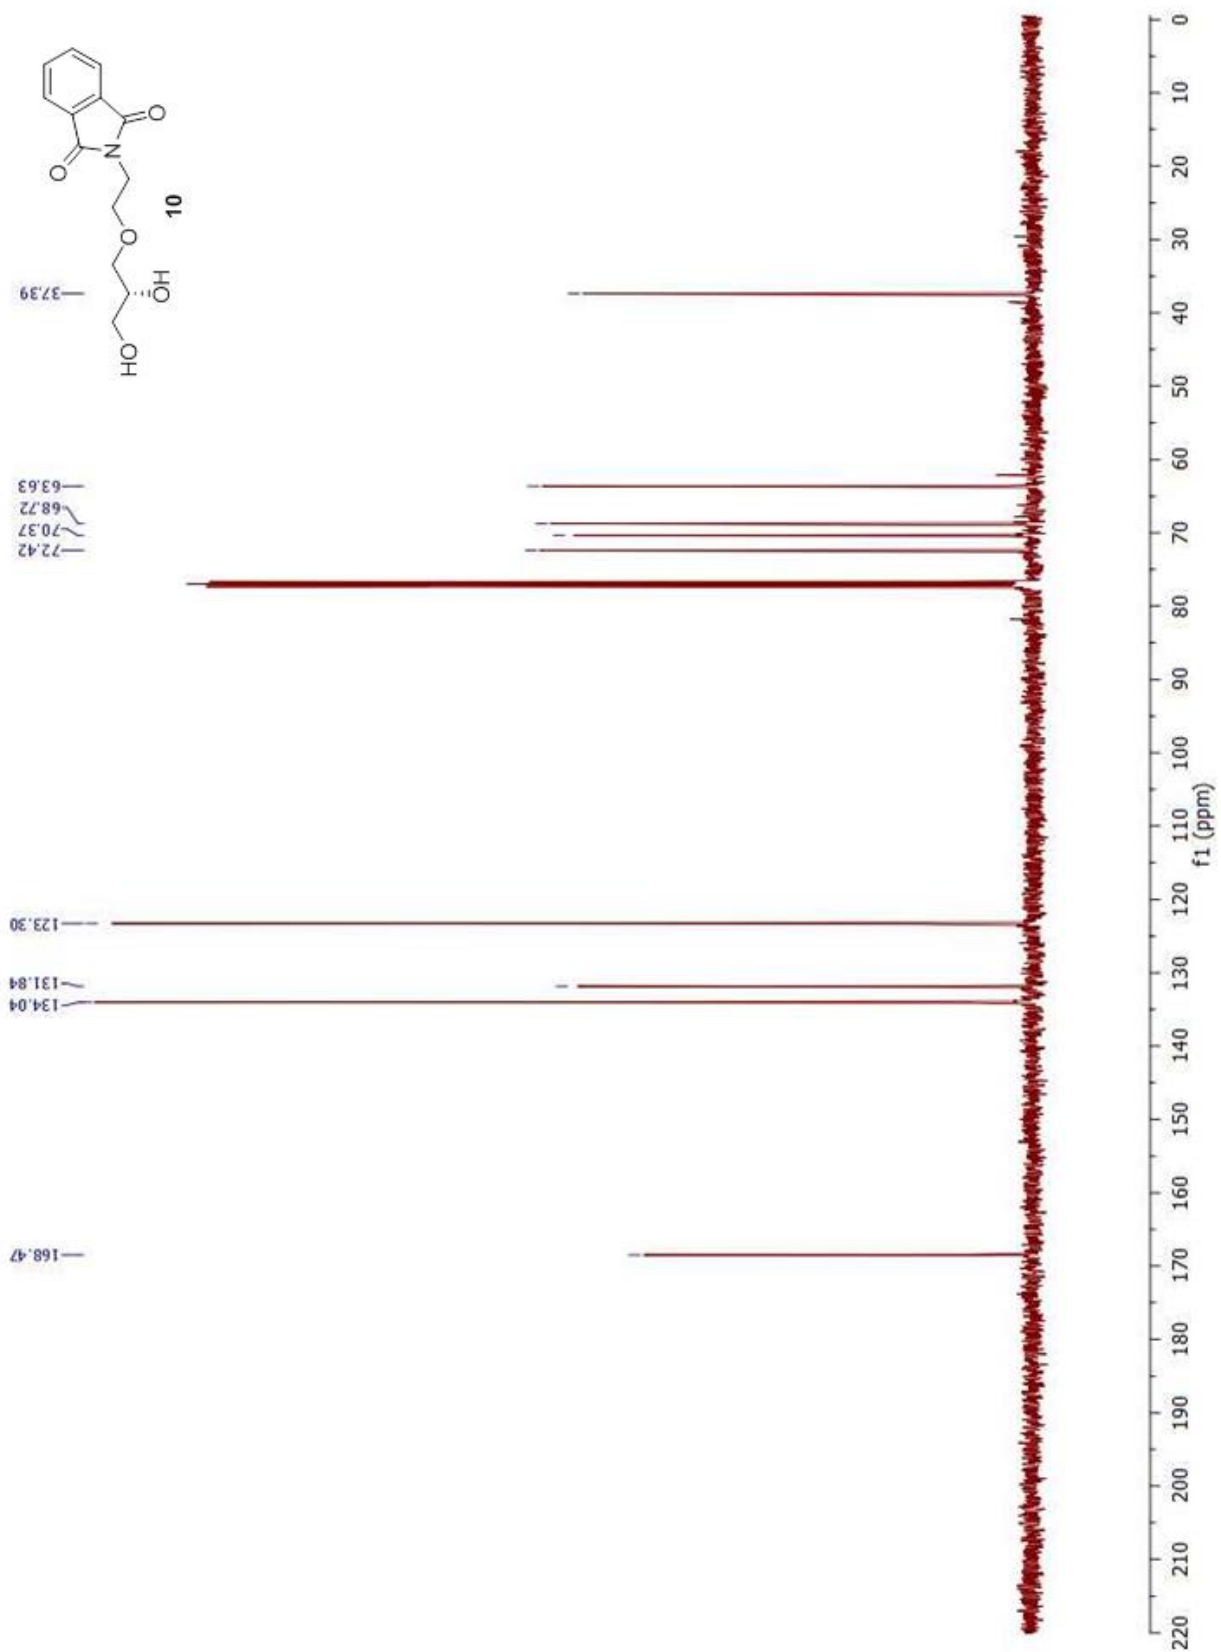

**Figure S21.**  $^{13}\text{C}$  NMR ( $\text{CDCl}_3$ ) of **11**

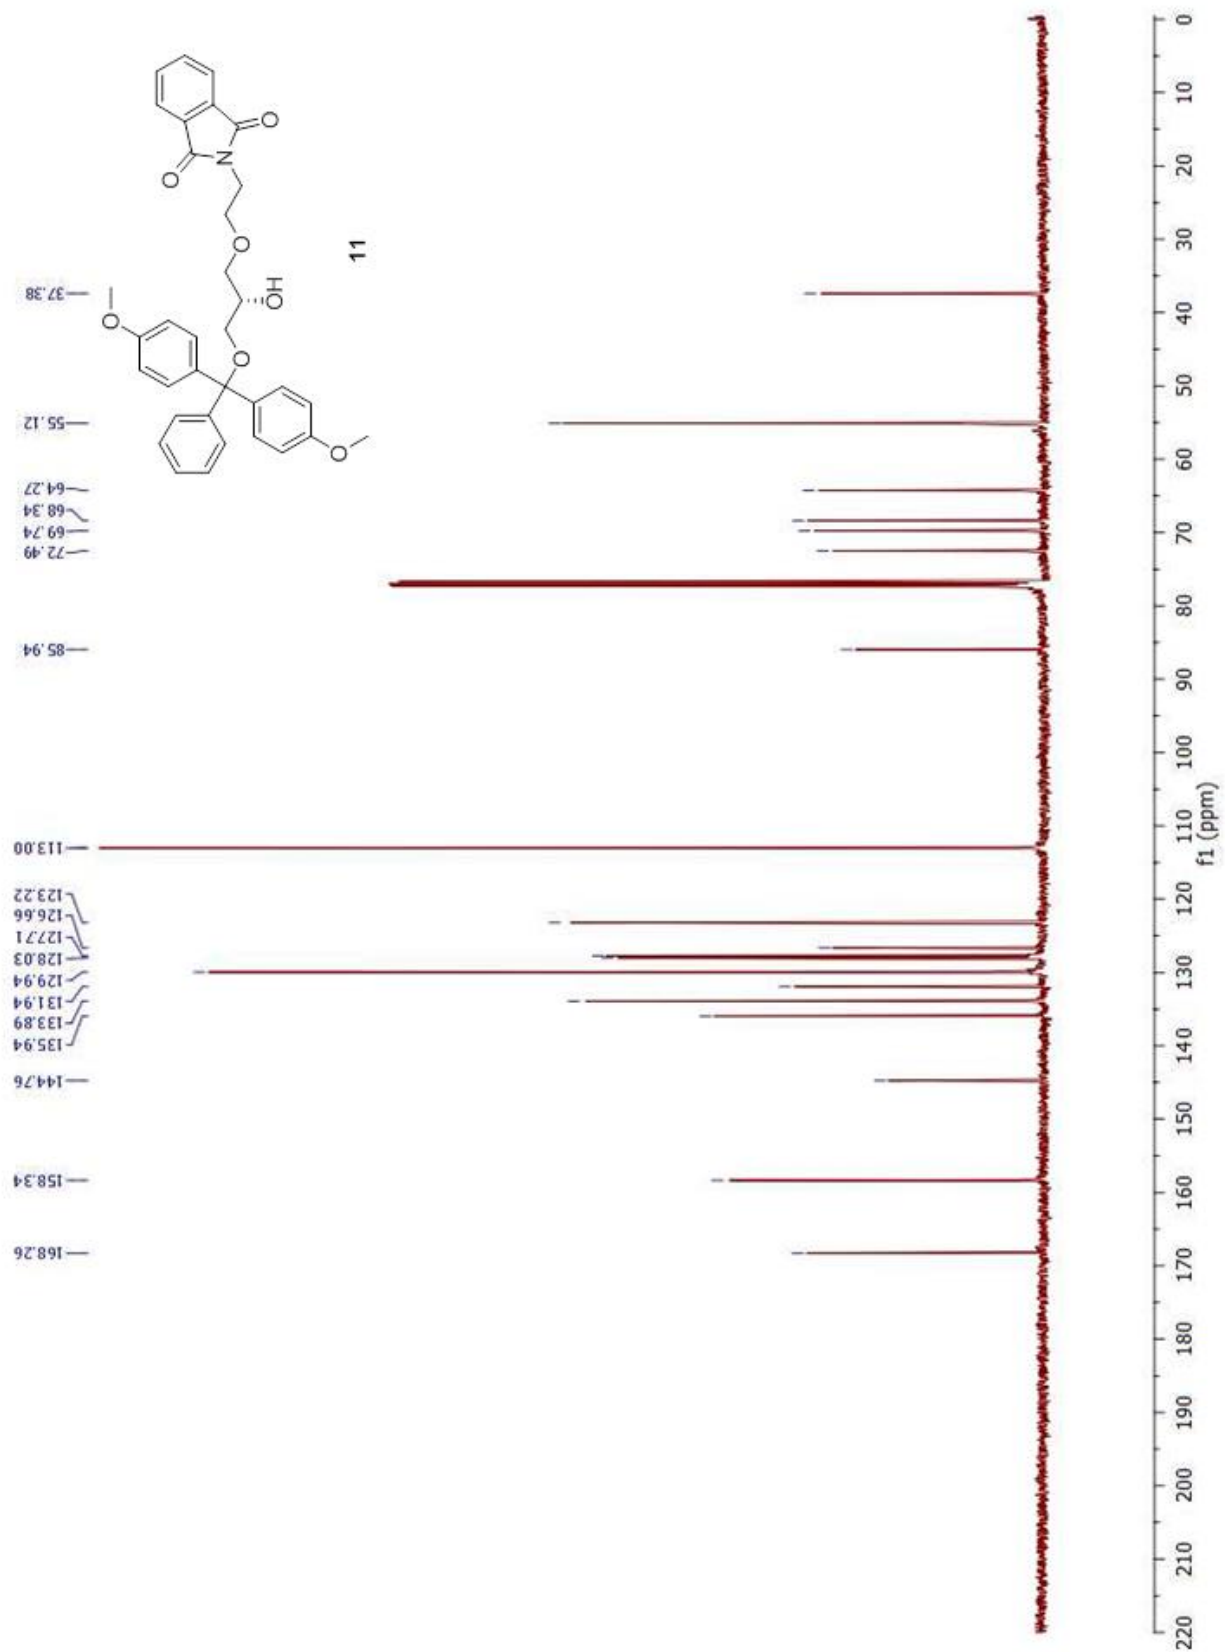



**Figure S22.**  $^{13}\text{C}$  NMR ( $\text{CDCl}_3$ ) of **12**

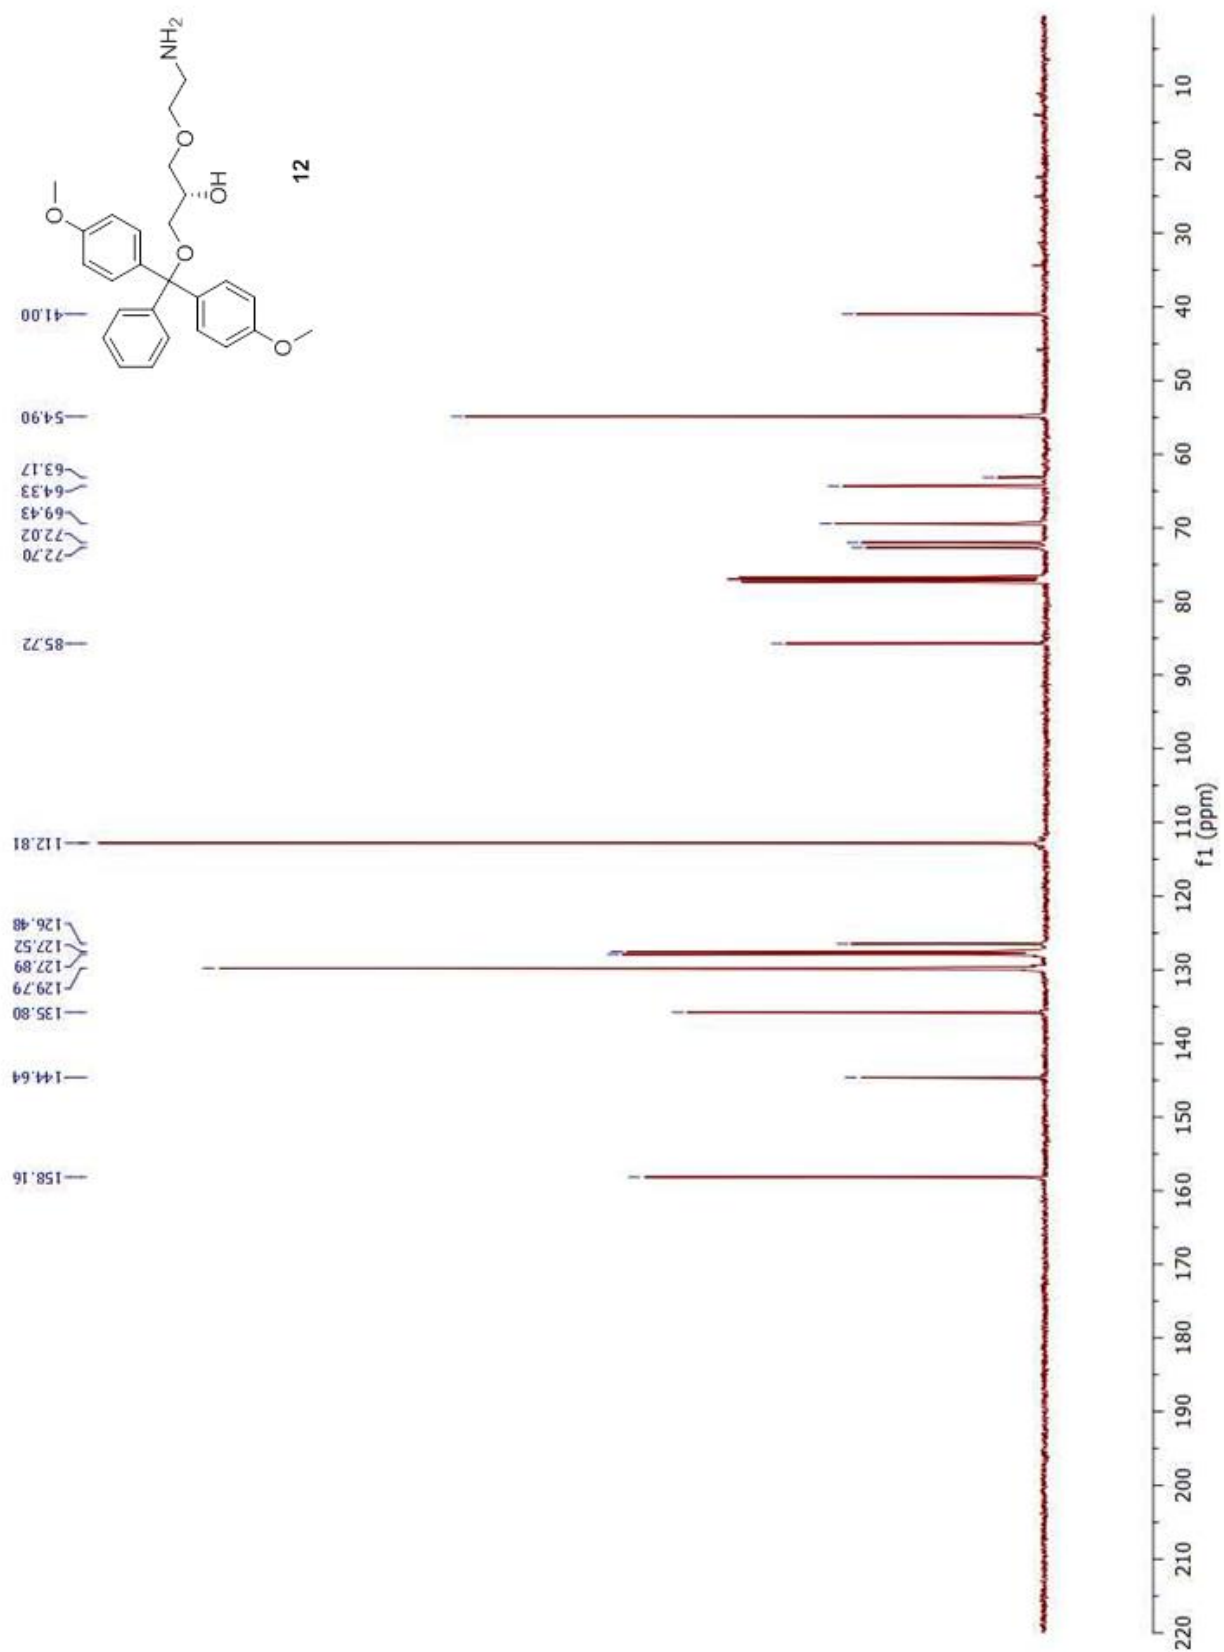

**Figure S23.**  $^{13}\text{C}$  NMR ( $\text{CDCl}_3$ ) of **14**

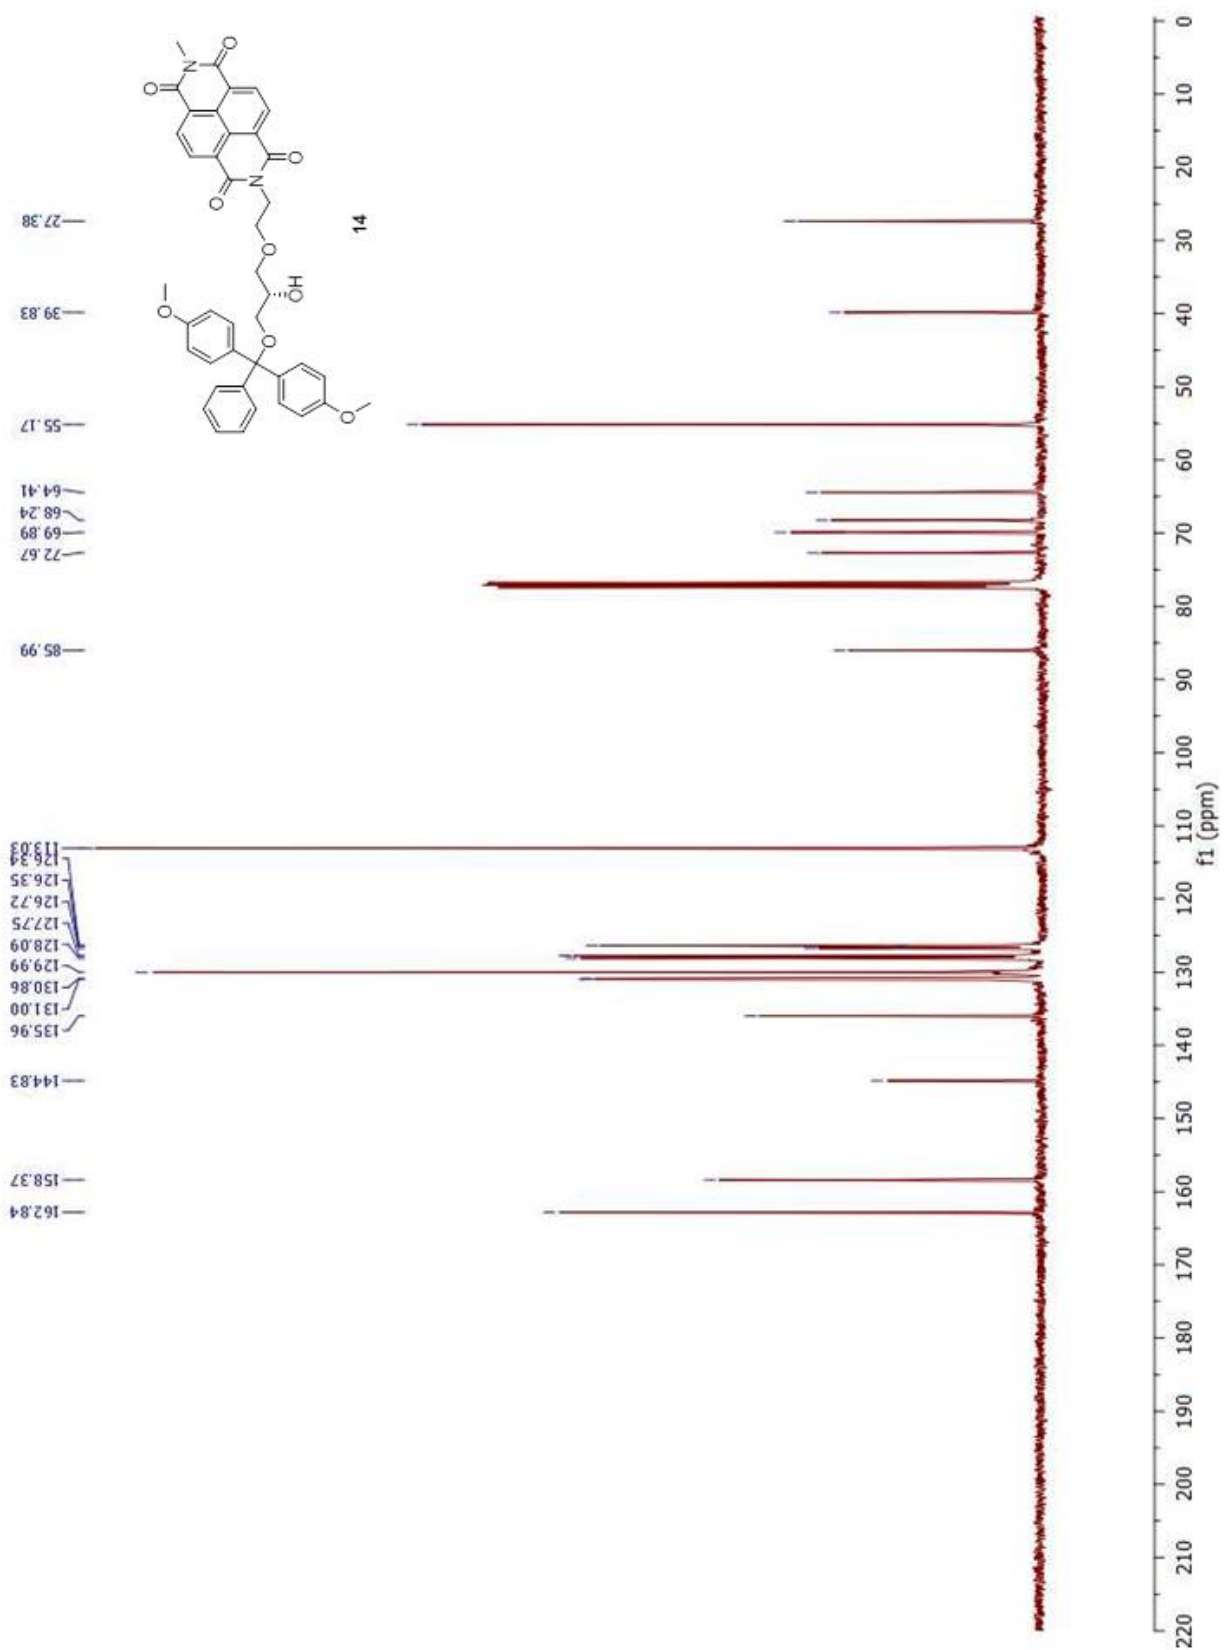

**Figure S24.**  $^{31}\text{P}$  NMR ( $\text{CDCl}_3$ ) of **1**

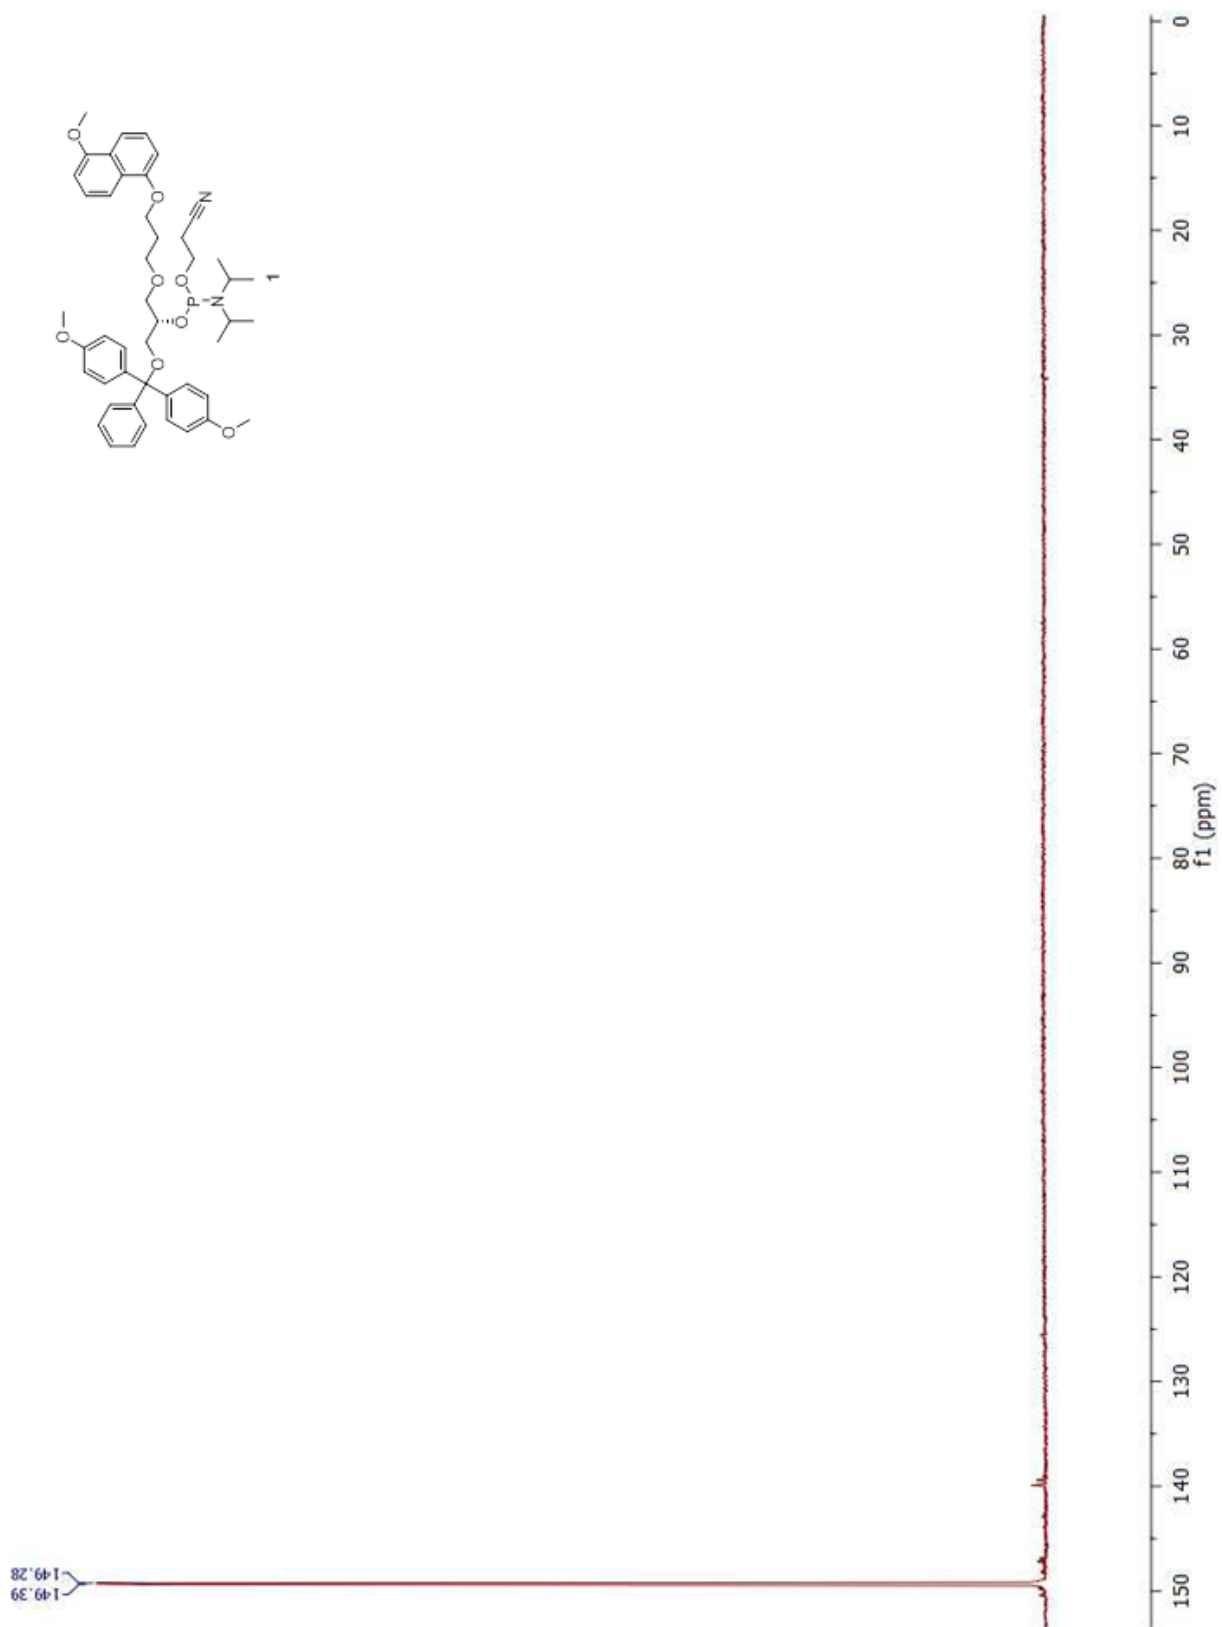

**Figure S25.**  $^{31}\text{P}$  NMR ( $\text{CDCl}_3$ ) of **2**

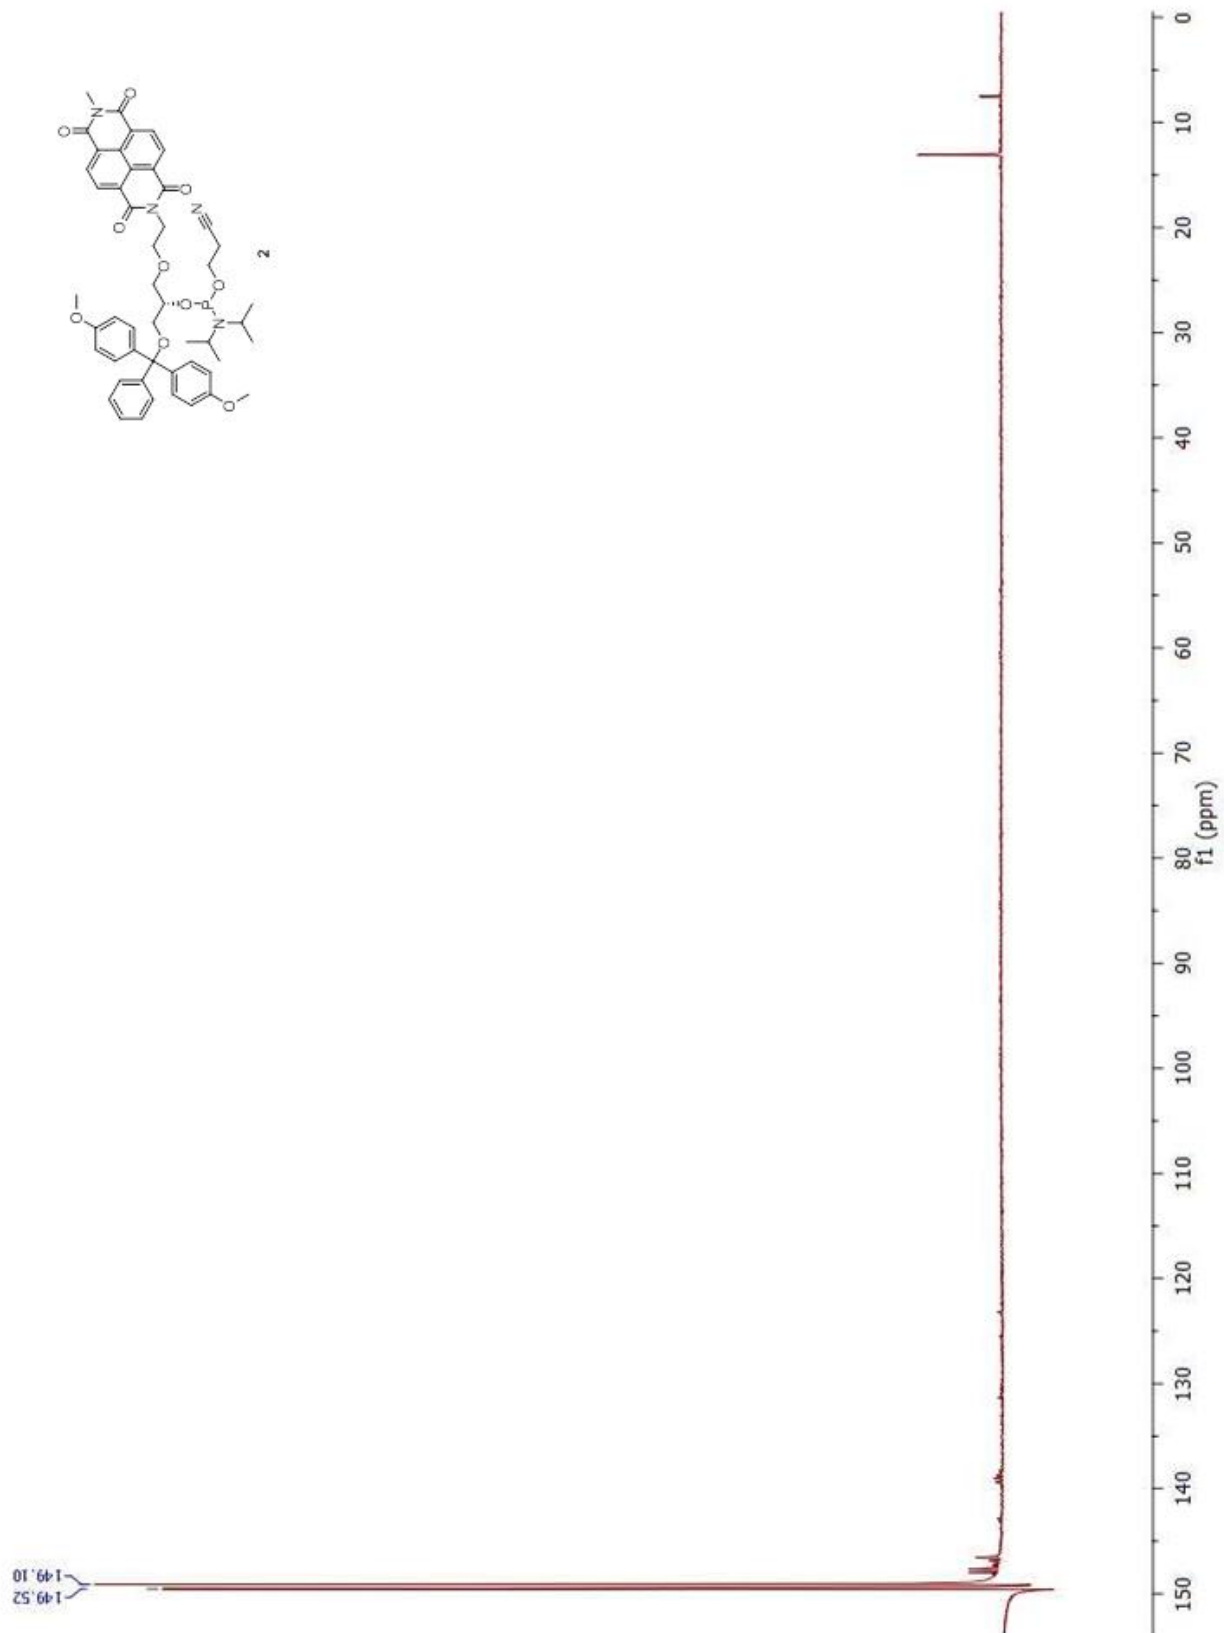

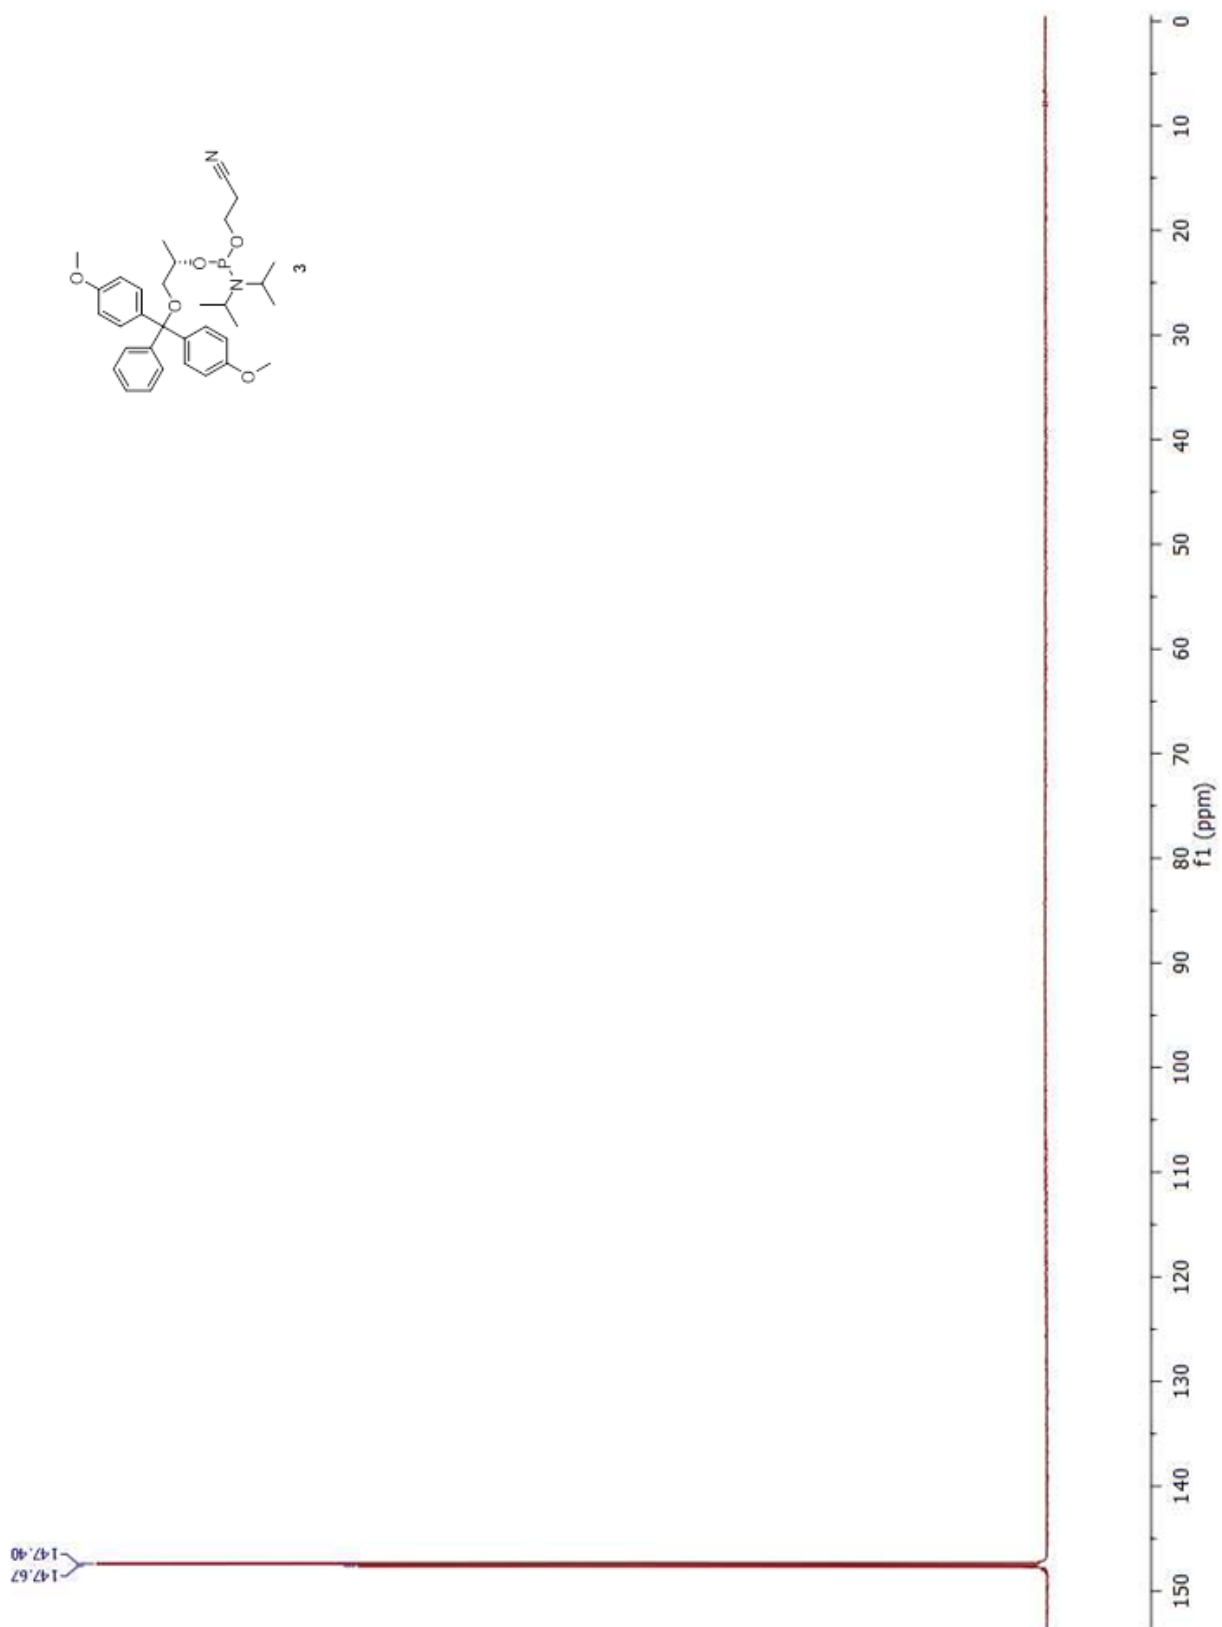

**Table S1.** HRMS-ESI of individual oligonucleotides.

| Sequence               | Ion                  | Mass (calcd) | Mass (found) |
|------------------------|----------------------|--------------|--------------|
| 5'-GACTGACCTGCG-3'     | [M-4H] <sup>-4</sup> | 910.1545     | 910.1540     |
| 5'-CGCAGGTCAGTC-3'     | [M-4H] <sup>-4</sup> | 910.1545     | 910.1537     |
| 5'-GACTGAAAACCTGCG-3'  | [M-5H] <sup>-5</sup> | 915.7567     | 915.7570     |
| 5'-CGCAGGTTTTTCAGTC-3' | [M-3H] <sup>-3</sup> | 1517.9211    | 1517.9144    |
| 5'-GACTGAGCGCCTGCG-3'  | [M-5H] <sup>-5</sup> | 917.3524     | 917.3528     |
| 5'-CGCAGGCGCTCAGTC-3'  | [M-3H] <sup>-3</sup> | 1516.2568    | 1516.2541    |
| 5'-GACTGASSSCCTGCG-3'  | [M-4H] <sup>-4</sup> | 1013.6607    | 1013.6586    |
| 5'-CGCAGGSSSTCAGTC-3'  | [M-5H] <sup>-5</sup> | 810.7271     | 810.7270     |
| 5'-GACTGADSDCCTGCG-3'  | [M-3H] <sup>-3</sup> | 1505.2795    | 1505.2785    |
| 5'-CGCAGGSNSTCAGTC-3'  | [M-5H] <sup>-5</sup> | 875.1389     | 875.1373     |
| 5'-GACTGANSNCCTGCG-3'  | [M-5H] <sup>-5</sup> | 939.5506     | 939.5497     |
| 5'-CGCAGGSDSTCAGTC-3'  | [M-4H] <sup>-4</sup> | 1071.1842    | 1071.1818    |

**Figure S27. HPLC Chromatograms of oligonucleotides made with 1, 2, and/or 3.**

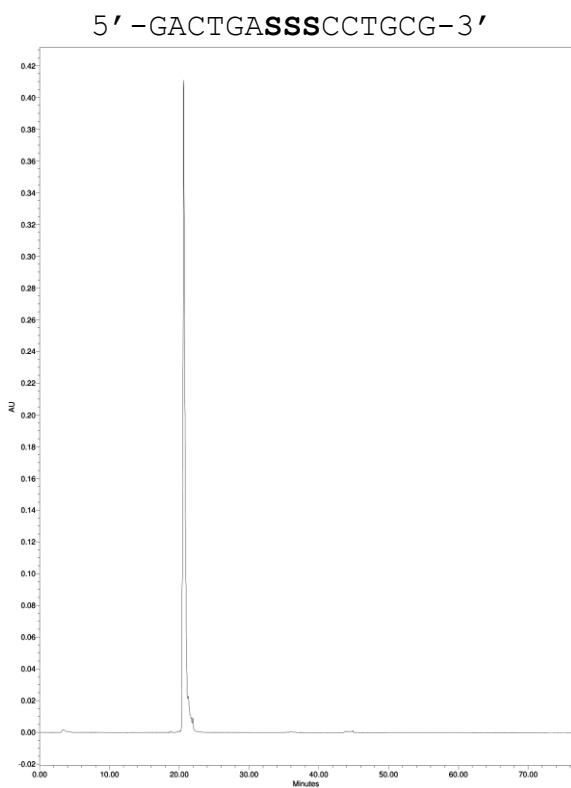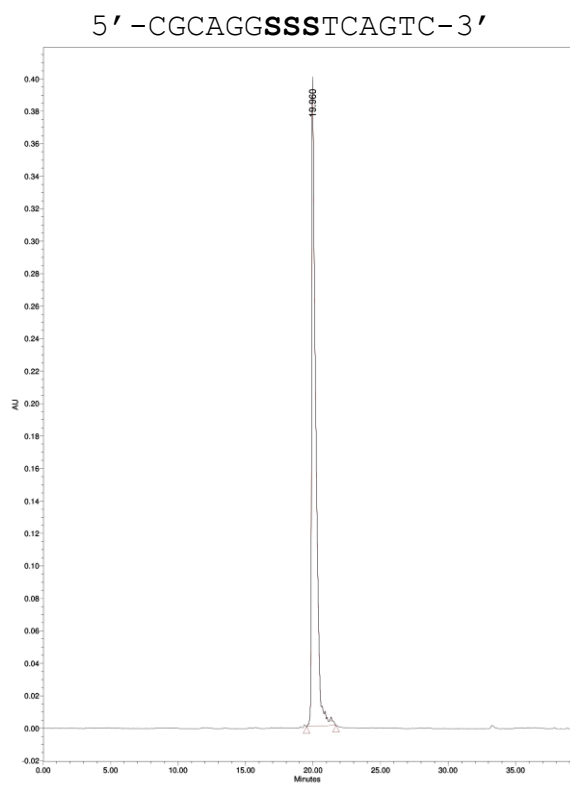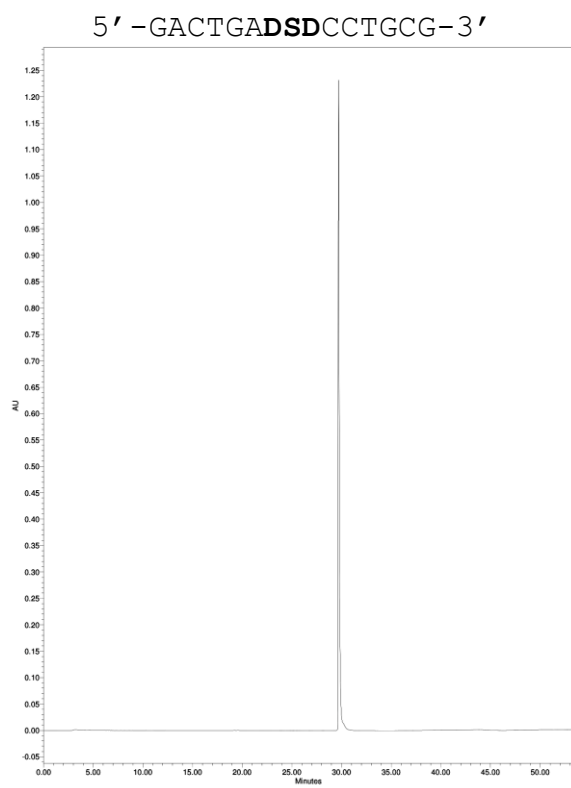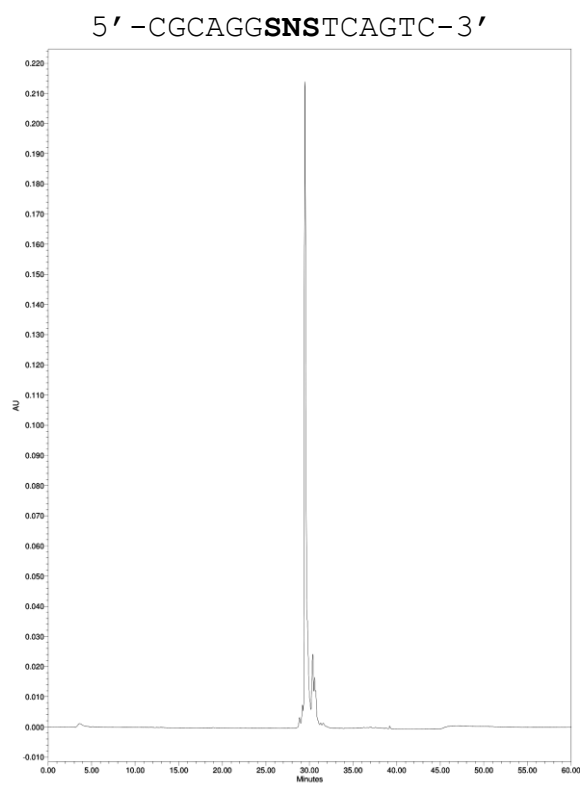

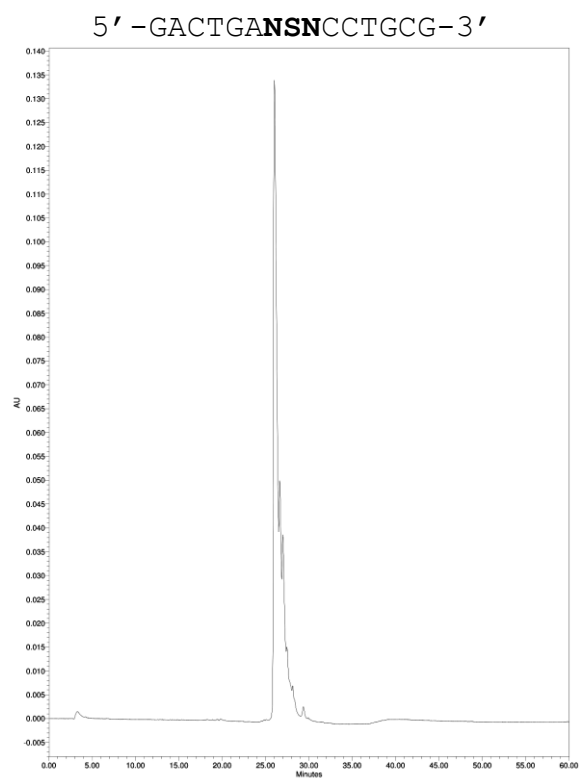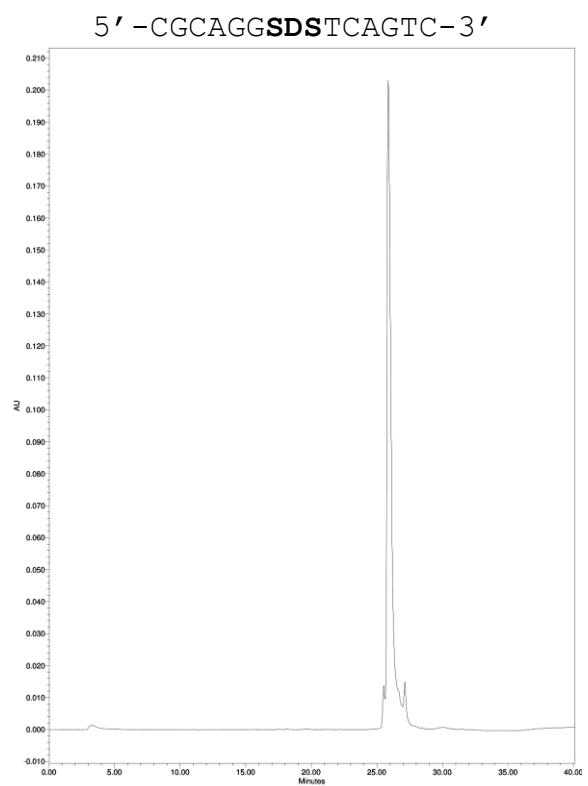



## Method for Determining Extinction Coefficient of **1** and **2**

The extinction coefficient of **1** and **2** were determined based on dilutions and UV measurements of water-soluble DAN and NDI analogues (**Figure S28**). The DAN and NDI analogues were diluted with a phosphate buffer (pH 7, 100 mM NaCl, 10 mM NaH<sub>2</sub>PO<sub>4</sub>, 0.1 mM EDTA) and UV absorbance measurements were taken at 260 nm. The resulting extinction coefficients (2504 and 1955 M<sup>-1</sup>•cm<sup>-1</sup>) were used as an estimate for the corresponding phosphoramidites **1** and **2**, respectively. Because the content of the non-natural DNA base analogues is small compared to the amount of naturally occurring DNA bases, this approximation is unlikely to cause any major discrepancies in DNA concentration.

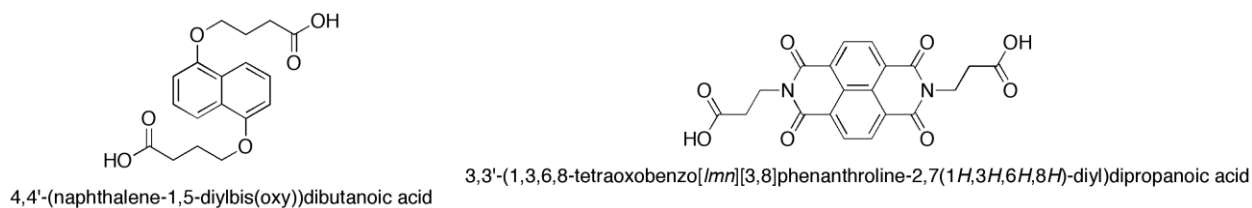

**Figure S28.** Structures of DAN and NDI analogues used to determine extinction coefficients for **1** and **2**.

**Figure S29.** UV melting curves of DNA duplexes.

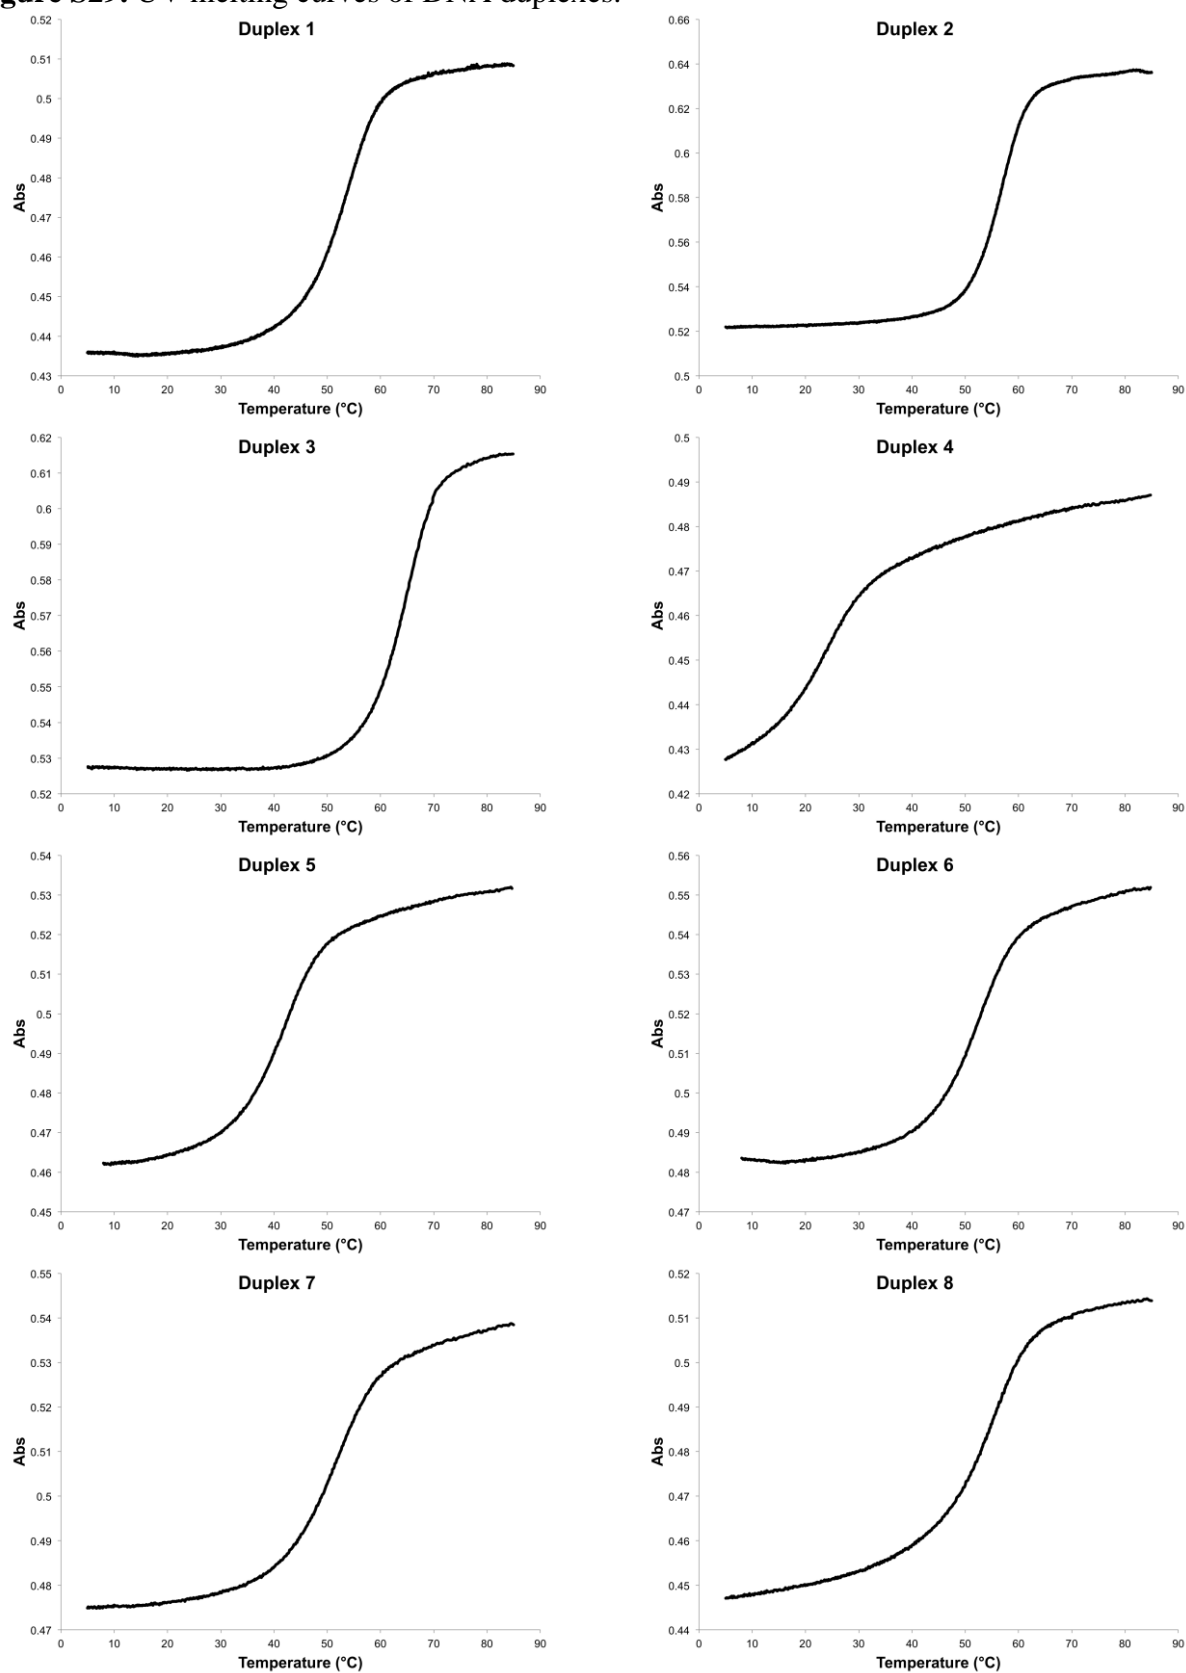

Supplement: Supplementary file 1 [file 3601005]
